# Supplementary material for: Limited role of generation time changes in driving the evolution of the mutation spectrum in humans
Source: eLife journal article supplement (doi:10.7554/elife.81188), 2023-02-13

Derived allele frequency

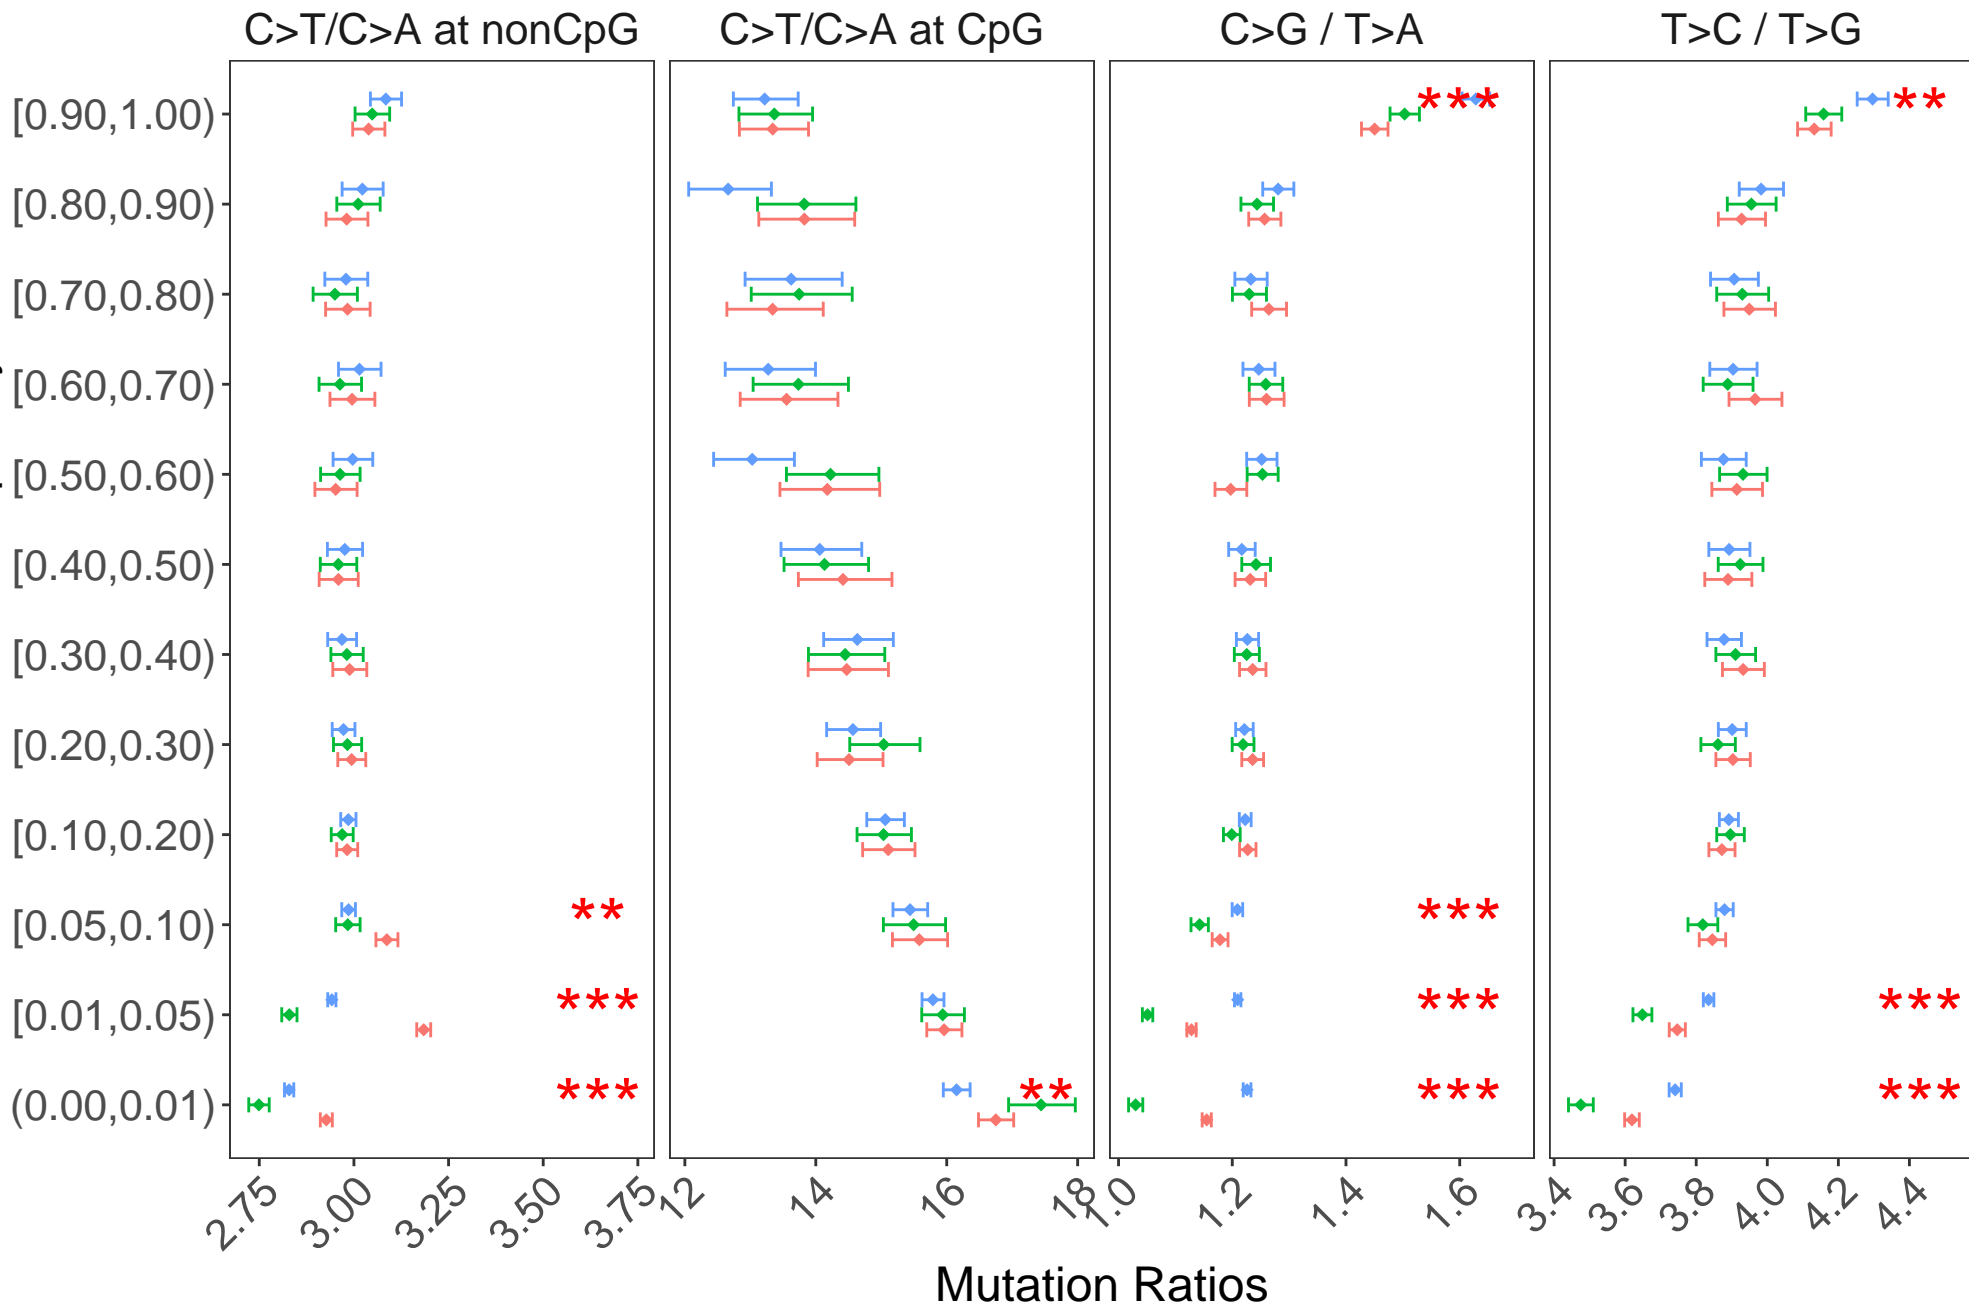

Supplement: supp [file elife-81188-supp-v1.zip]
