# Supplementary material for: Limited role of generation time changes in driving the evolution of the mutation spectrum in humans
Source: eLife journal article supplement (doi:10.7554/elife.81188), 2023-02-13

Allele age (generations)

T>C/T>G

T>C/T>A

T>A/T>G

(66500,3e+06]  
(42100,66500]  
(28600,42100]  
(19900,28600]  
(13700,19900]  
(9040,13700]  
(5520,9040]  
(3130,5520]  
(1720,3130]  
(860,1720]  
(425,860]  
(233,425]  
(124,233]  
(55,124]  
(0,55]

3.9

4.2

4.5

4.8

5.1

4.0

4.5

5.0

5.5

0.90

0.95

1.00

1.05

1.10

1.15

Mutation Ratios

Population

CEU  
CHB  
YRI

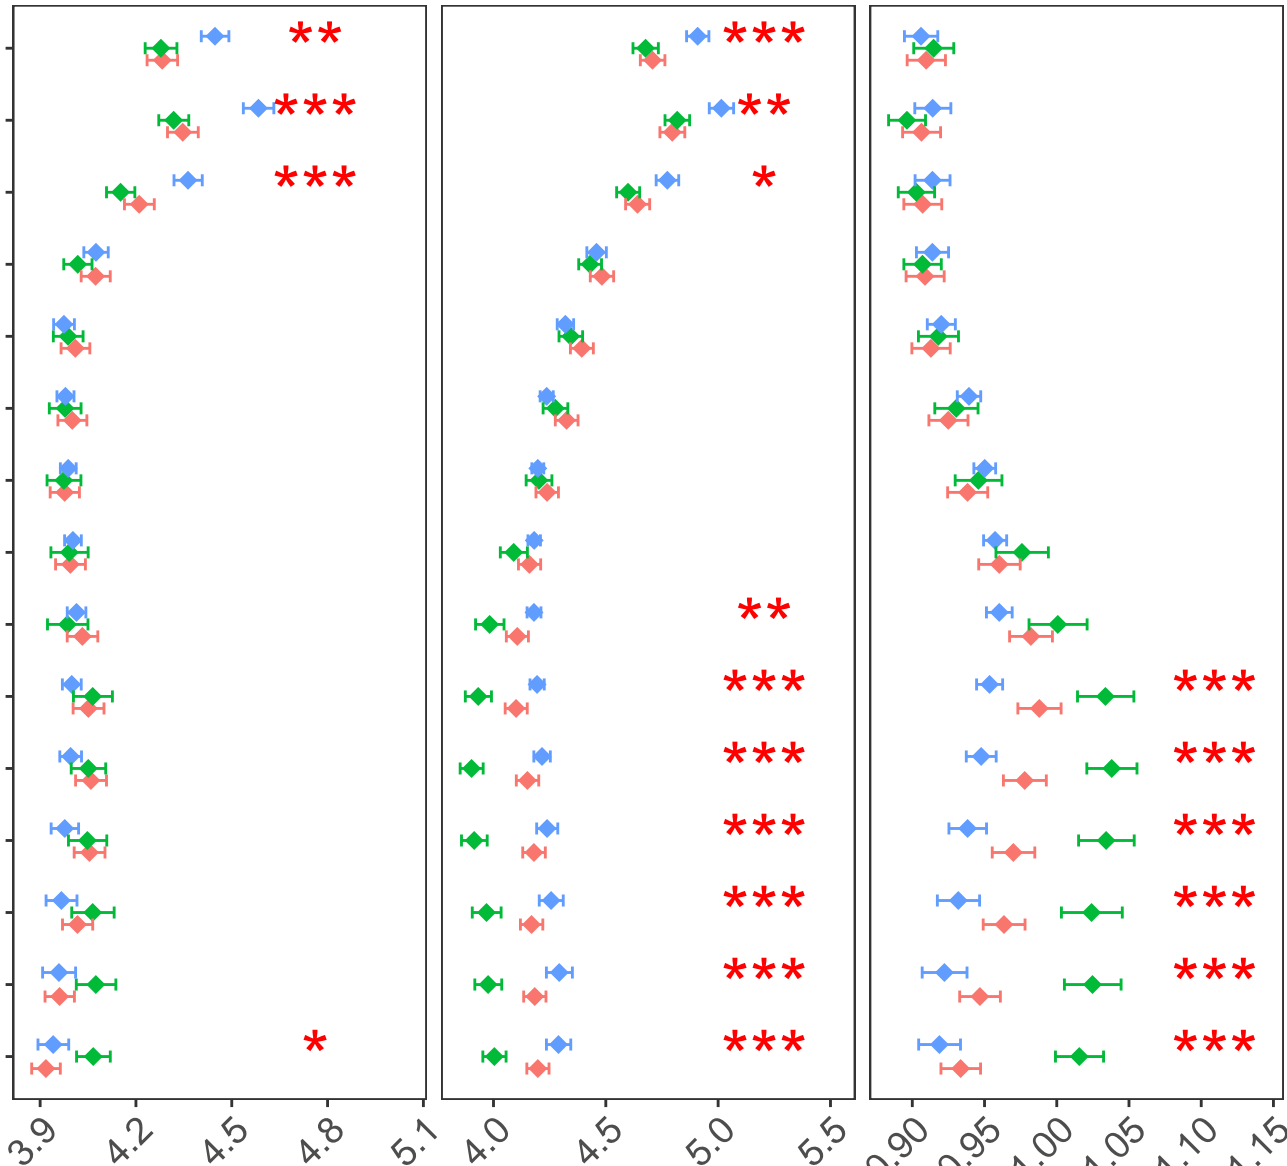

Supplement: supp [file elife-81188-supp-v1.zip]
