# Supplementary material for: Limited role of generation time changes in driving the evolution of the mutation spectrum in humans
Source: eLife journal article supplement (doi:10.7554/elife.81188), 2023-02-13
Supplement: supp [file elife-81188-supp-v1.zip › elife_poa_e81188_FFigure_2_figure_supplement_13.pdf]

Allele age (generations)

C>T/C>A at nonCpG

C>T/C>A at CpG

C>G / T>A

T>C / T>G

Population

YRI  
CEU  
CHB

(66500,3e+06]  
(42100,66500]  
(28600,42100]  
(19900,28600]  
(13700,19900]  
(9040,13700]  
(5520,9040]  
(3130,5520]  
(1720,3130]  
(860,1720]  
(425,860]  
(233,425]  
(124,233]  
(55,124]  
(0,55]

3.00

3.25

3.50

14

16

18

20

22

1.1

1.2

1.3

1.4

4.00

4.25

4.50

4.75

Mutation Ratios
