# Supplementary material for: Limited role of generation time changes in driving the evolution of the mutation spectrum in humans
Source: eLife journal article supplement (doi:10.7554/elife.81188), 2023-02-13
Supplement: supp [file elife-81188-supp-v1.zip › elife_poa_e81188_Figure_2_figure_supplement_8.pdf]

#SNPs in three  
oldest age bins

## Shared SNPs

## Non-shared SNPs

T>C

T>G

T>C

T>G

CEU

396,861

94,185

417,943

101,821

CHB

440,849

105,011

390,098

96,257

YRI

327,006

76,468

598,656

137,496

Allele age (generations)

(66500,3e+06]

(42100,66500]

(28600,42100]

(19900,28600]

(13700,19900]

(9040,13700]

(5520,9040]

(3130,5520]

(1720,3130]

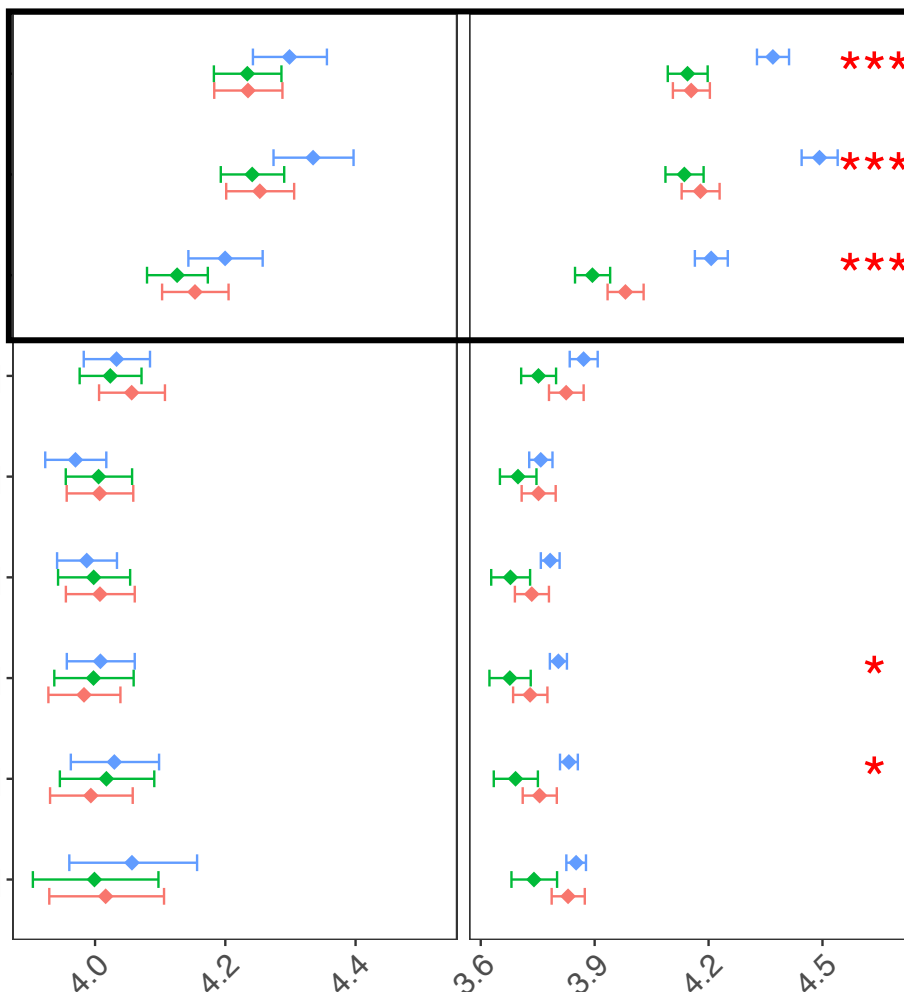

Population

CEU  
CHB  
YRI

T>C/T>G mutation ratio
