# Supplementary material for: Limited role of generation time changes in driving the evolution of the mutation spectrum in humans
Source: eLife journal article supplement (doi:10.7554/elife.81188), 2023-02-13

A

Ancestral allele determined based  
on chimpanzee reference genome

|     |           |         |
|-----|-----------|---------|
| CEU | 2,150,181 | 521,138 |
| CHB | 1,701,944 | 410,897 |
| YRI | 3,919,706 | 949,145 |

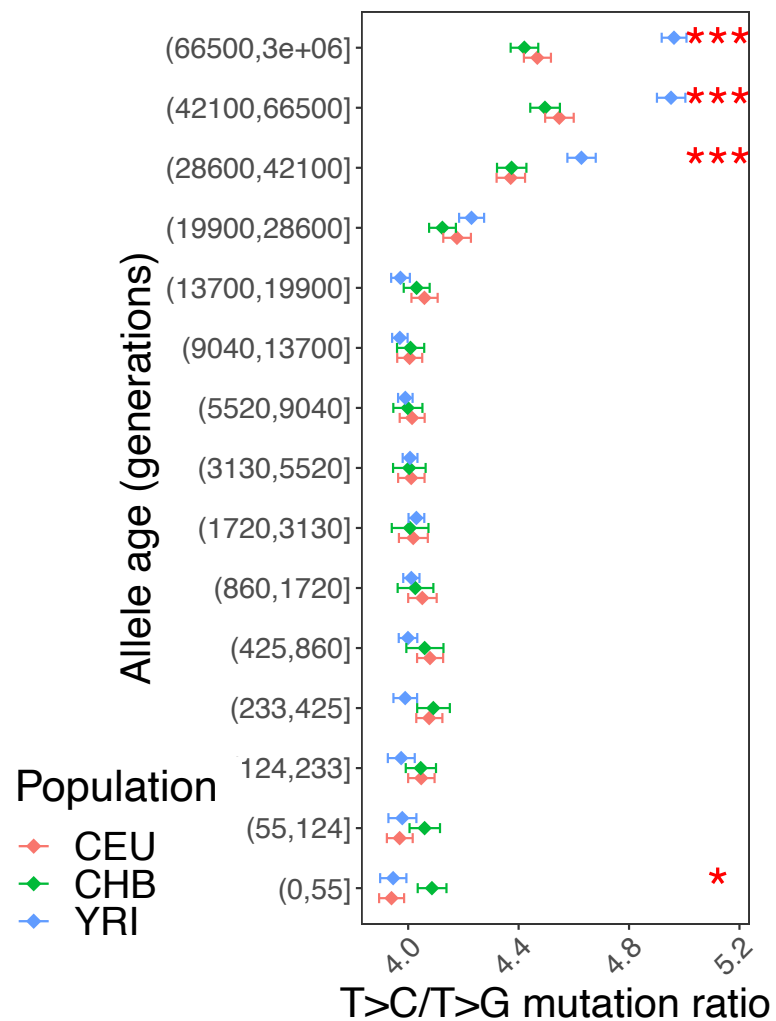

B

Ancestral allele determined based on only  
high-confidence EPO ancestral allele

|     |           |         |
|-----|-----------|---------|
| CEU | 2,111,161 | 522,691 |
| CHB | 1,667,990 | 411,950 |
| YRI | 3,845,630 | 952,330 |

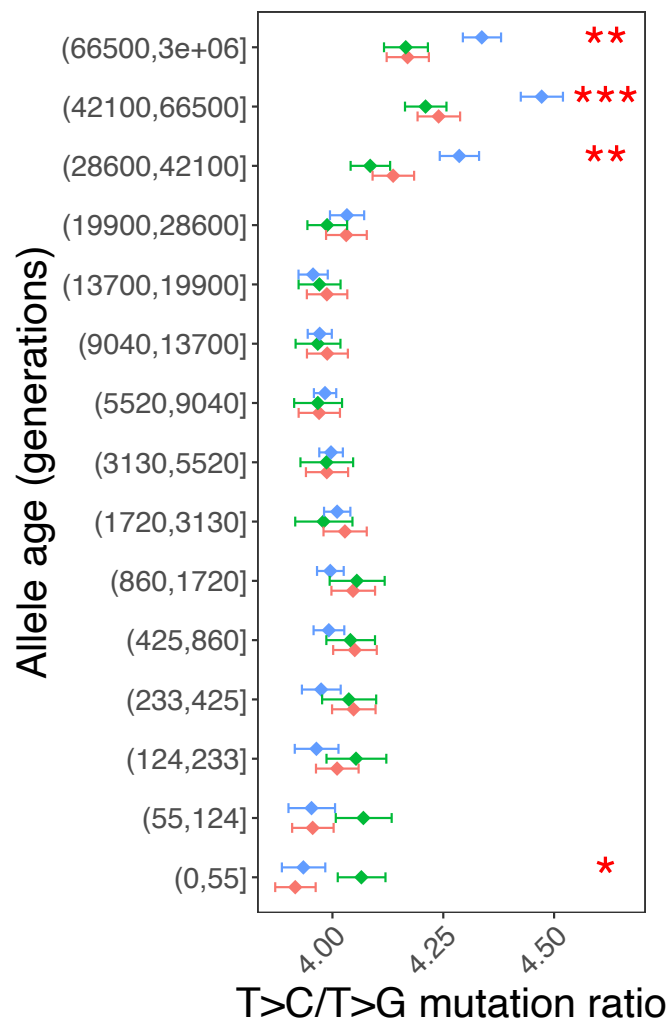

C

Genomic regions stratified by local ancestry  
of the human reference genome

|     |         |         |           |         |
|-----|---------|---------|-----------|---------|
| CEU | 348,502 | 85,819  | 650,124   | 158,948 |
| CHB | 278,329 | 68,505  | 510,915   | 124,299 |
| YRI | 633,150 | 156,021 | 1,175,594 | 288,768 |

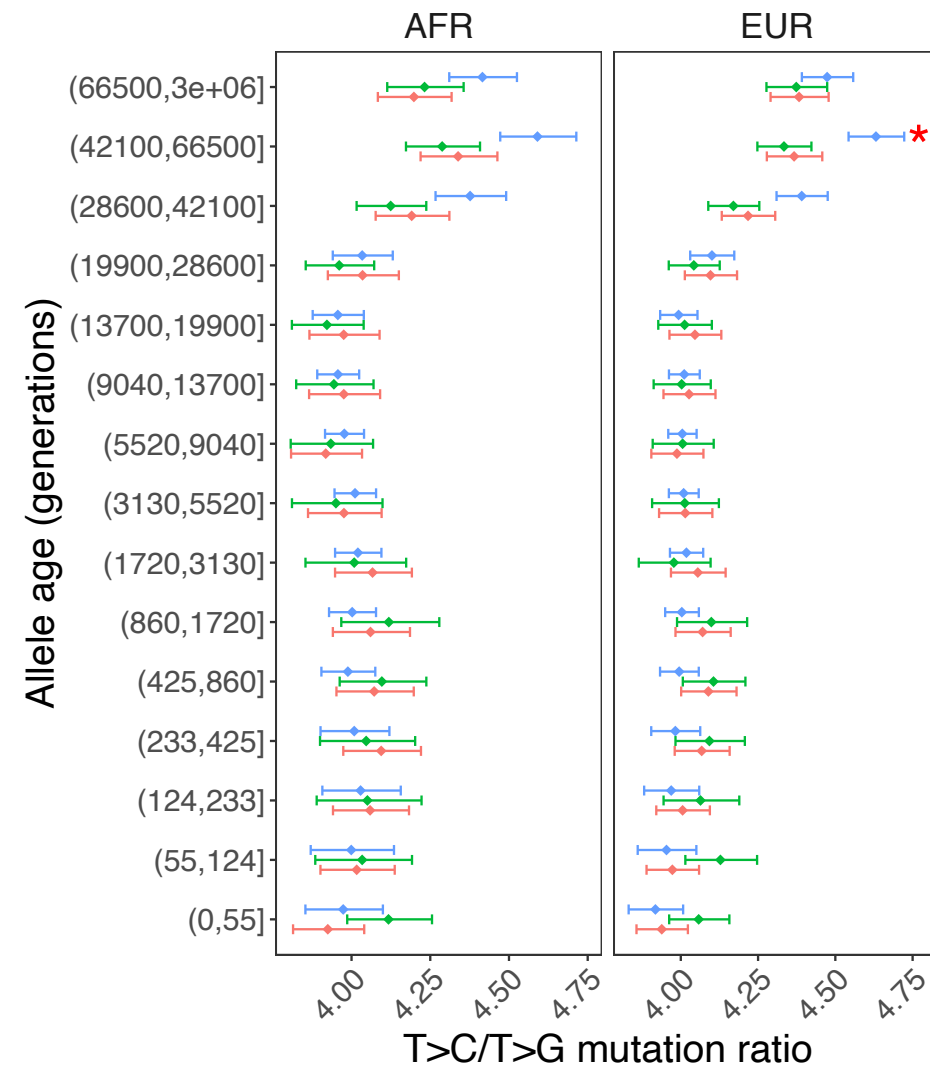

Supplement: supp [file elife-81188-supp-v1.zip › elife_poa_e81188_Figure_2_figure_supplement_12.pdf]
