# Supplementary material for: Limited role of generation time changes in driving the evolution of the mutation spectrum in humans
Source: eLife journal article supplement (doi:10.7554/elife.81188), 2023-02-13

A

Young variants in  
CEU in 1000G  
(binned by age)

DNMs identified  
in Icelandic trios  
(by publication)

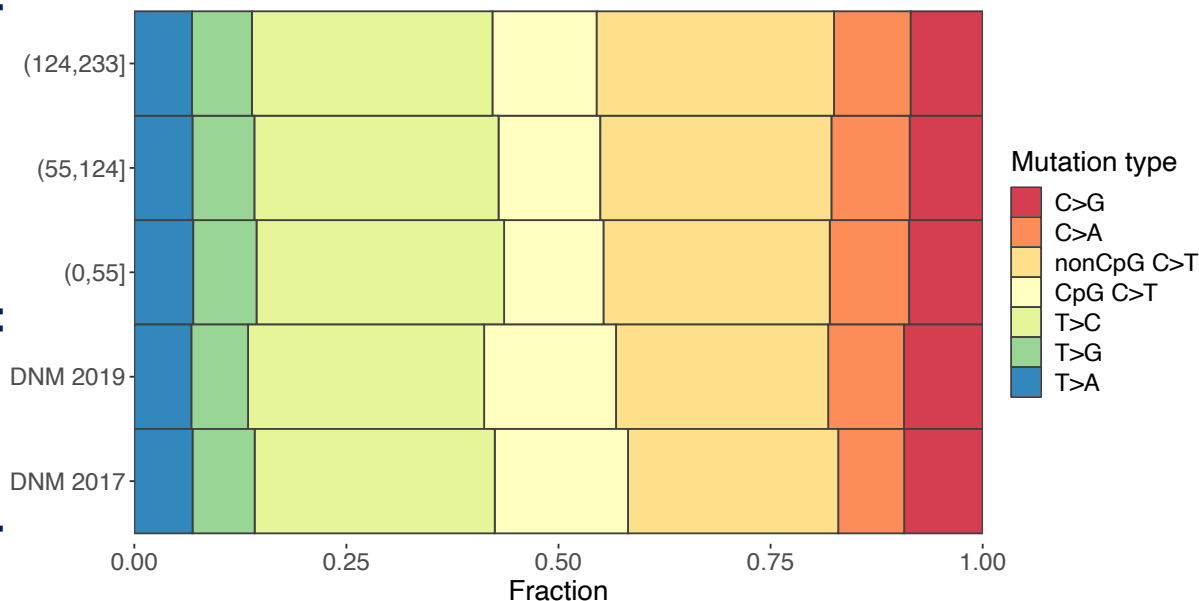

B

Young variants in  
CEU in 1000G  
(binned by age)

DNMs identified  
in Icelandic trios  
(by publication)

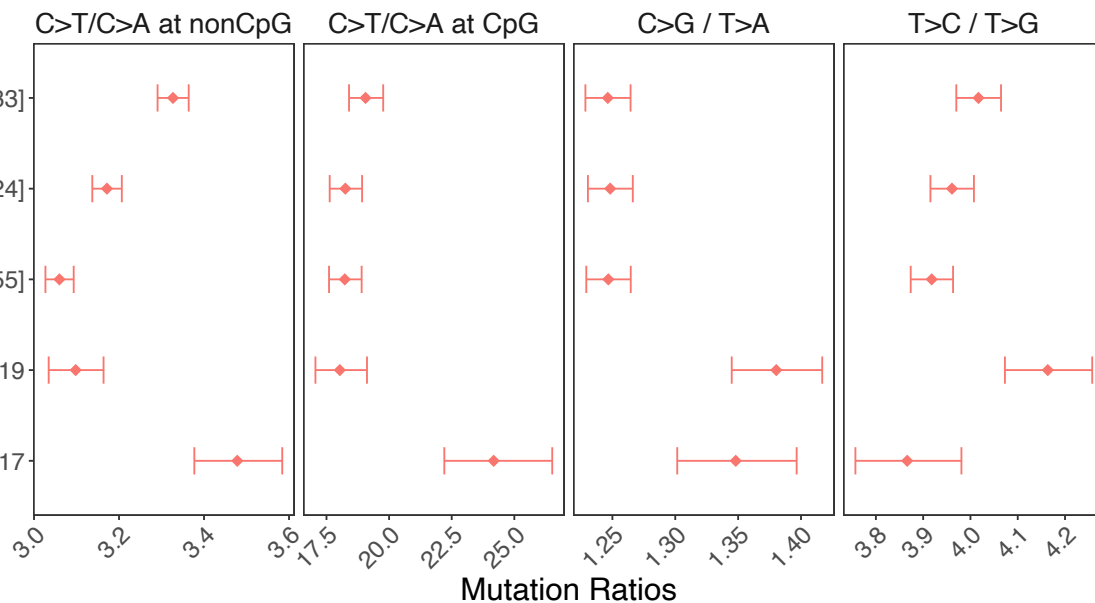

Supplement: supp [file elife-81188-supp-v1.zip › elife_poa_e81188_Figure_3_figure_supplement_2.pdf]
