# Supplementary material for: Limited role of generation time changes in driving the evolution of the mutation spectrum in humans
Source: eLife journal article supplement (doi:10.7554/elife.81188), 2023-02-13

A

Simulated C>G/T>A by generation time  
**outside** maternal mutation hotspots

Generation time 1

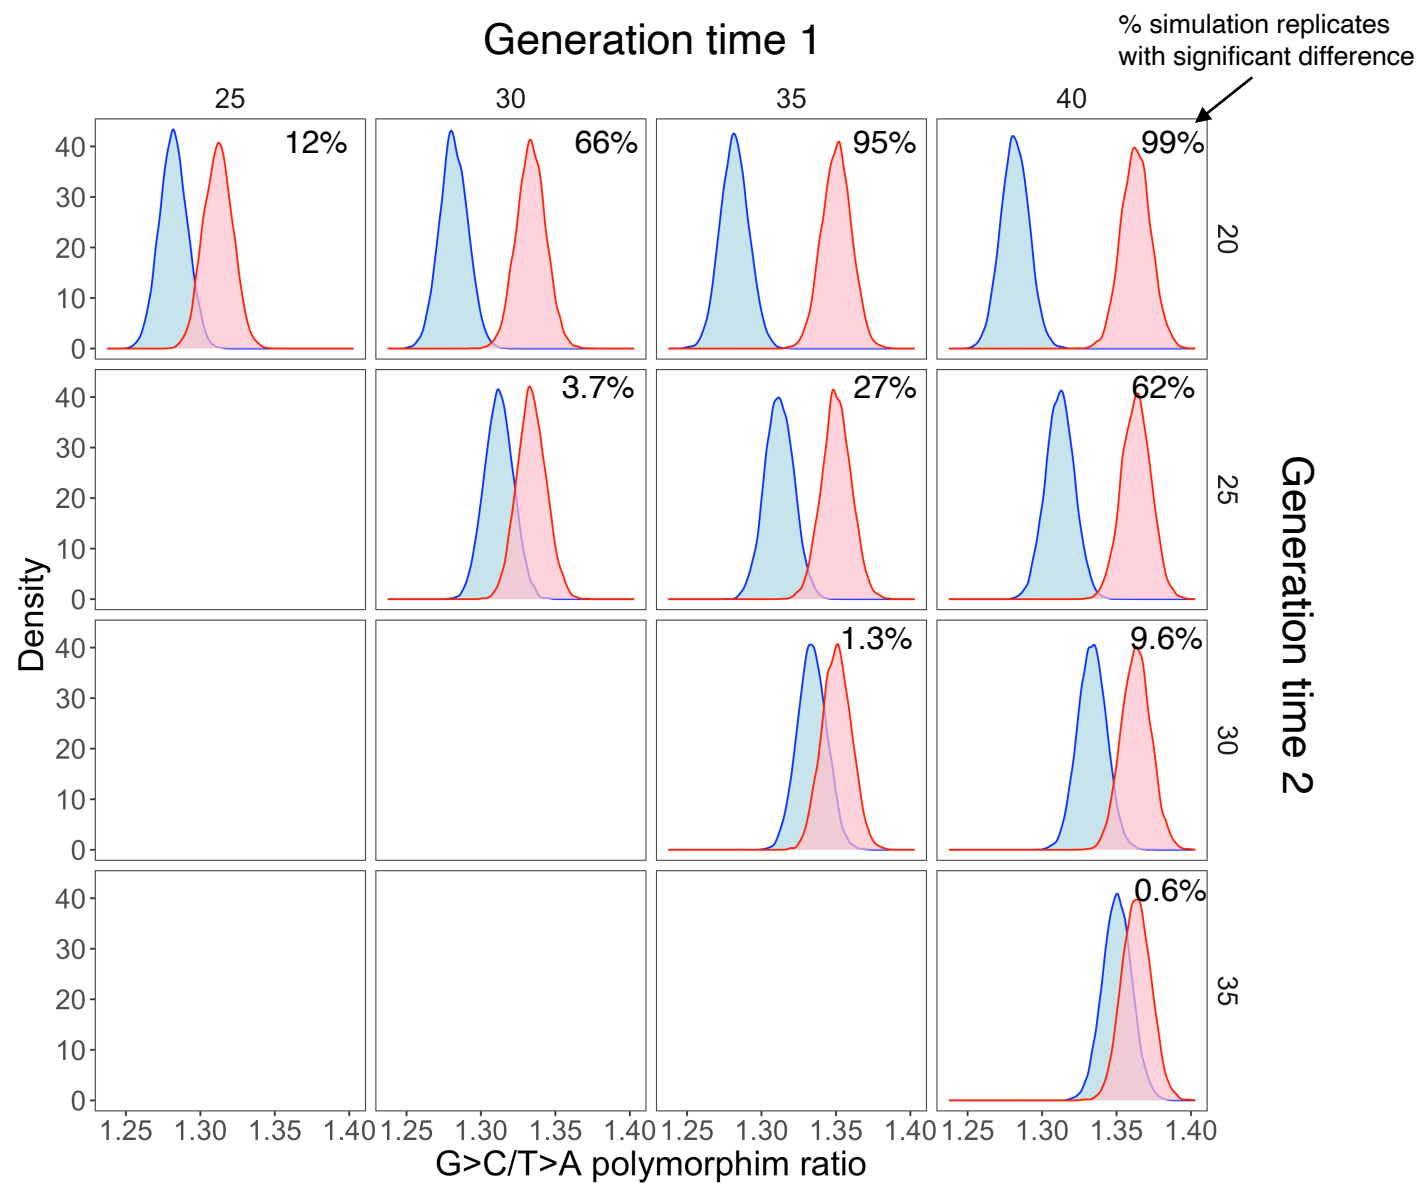

B

Simulated C>G/T>A by generation time  
**within** maternal mutation hotspots

Generation time 1

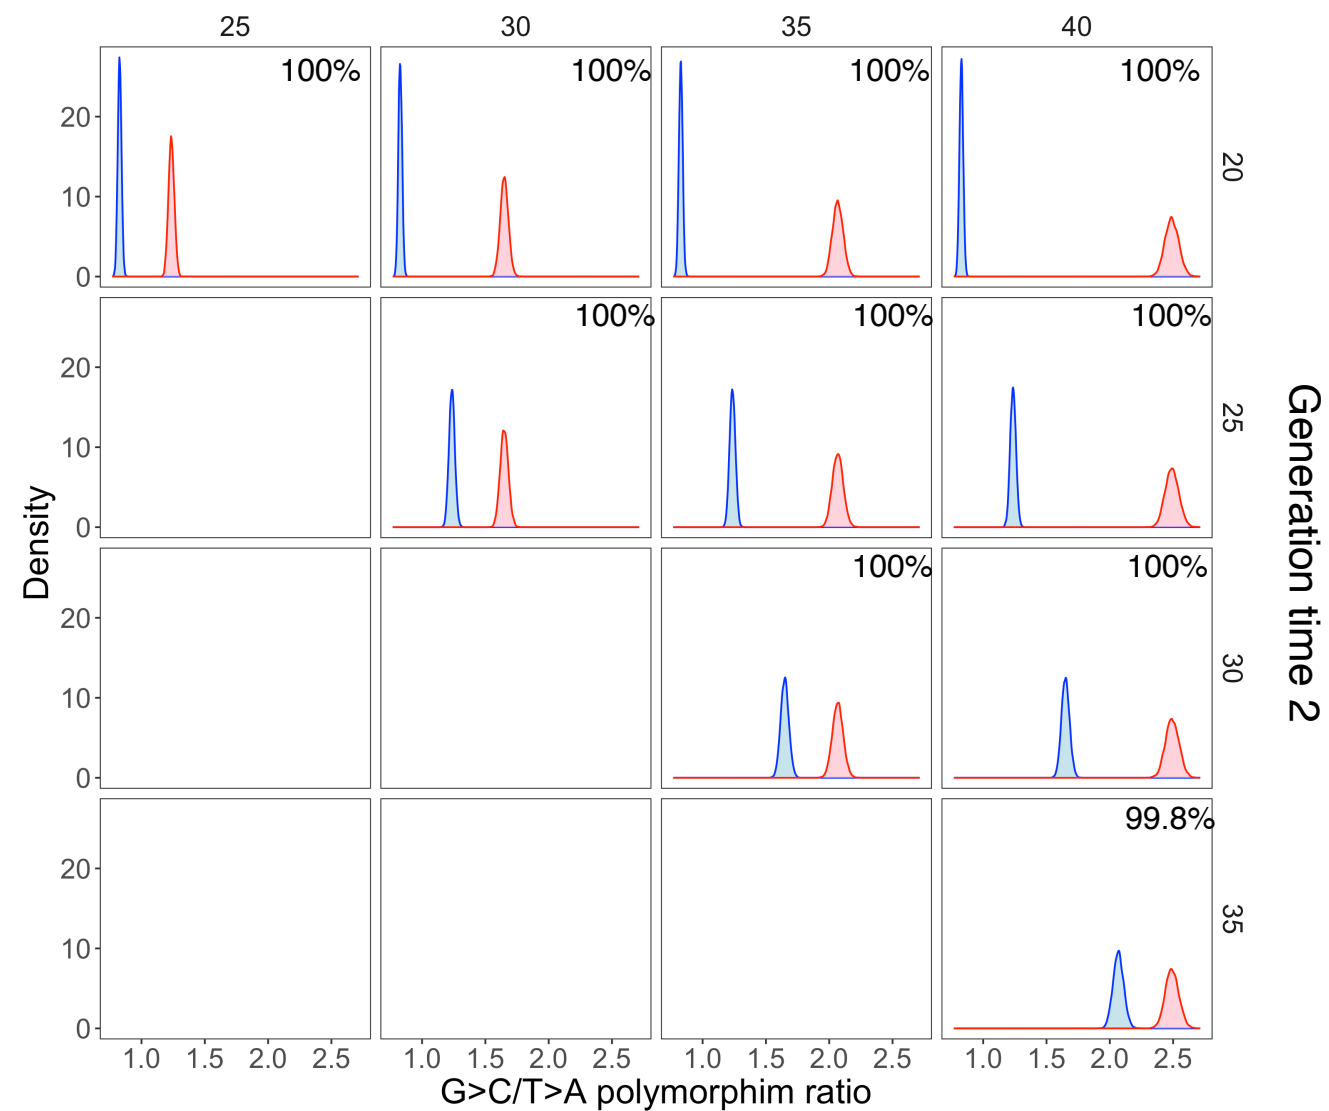

Supplement: supp [file elife-81188-supp-v1.zip › elife_poa_e81188_Figure_3_figure_supplement_4.pdf]
