# Supplementary material for: Limited role of generation time changes in driving the evolution of the mutation spectrum in humans
Source: eLife journal article supplement (doi:10.7554/elife.81188), 2023-02-13

A.

Predicted maternal age (on x-axis)

Allele age (generations)

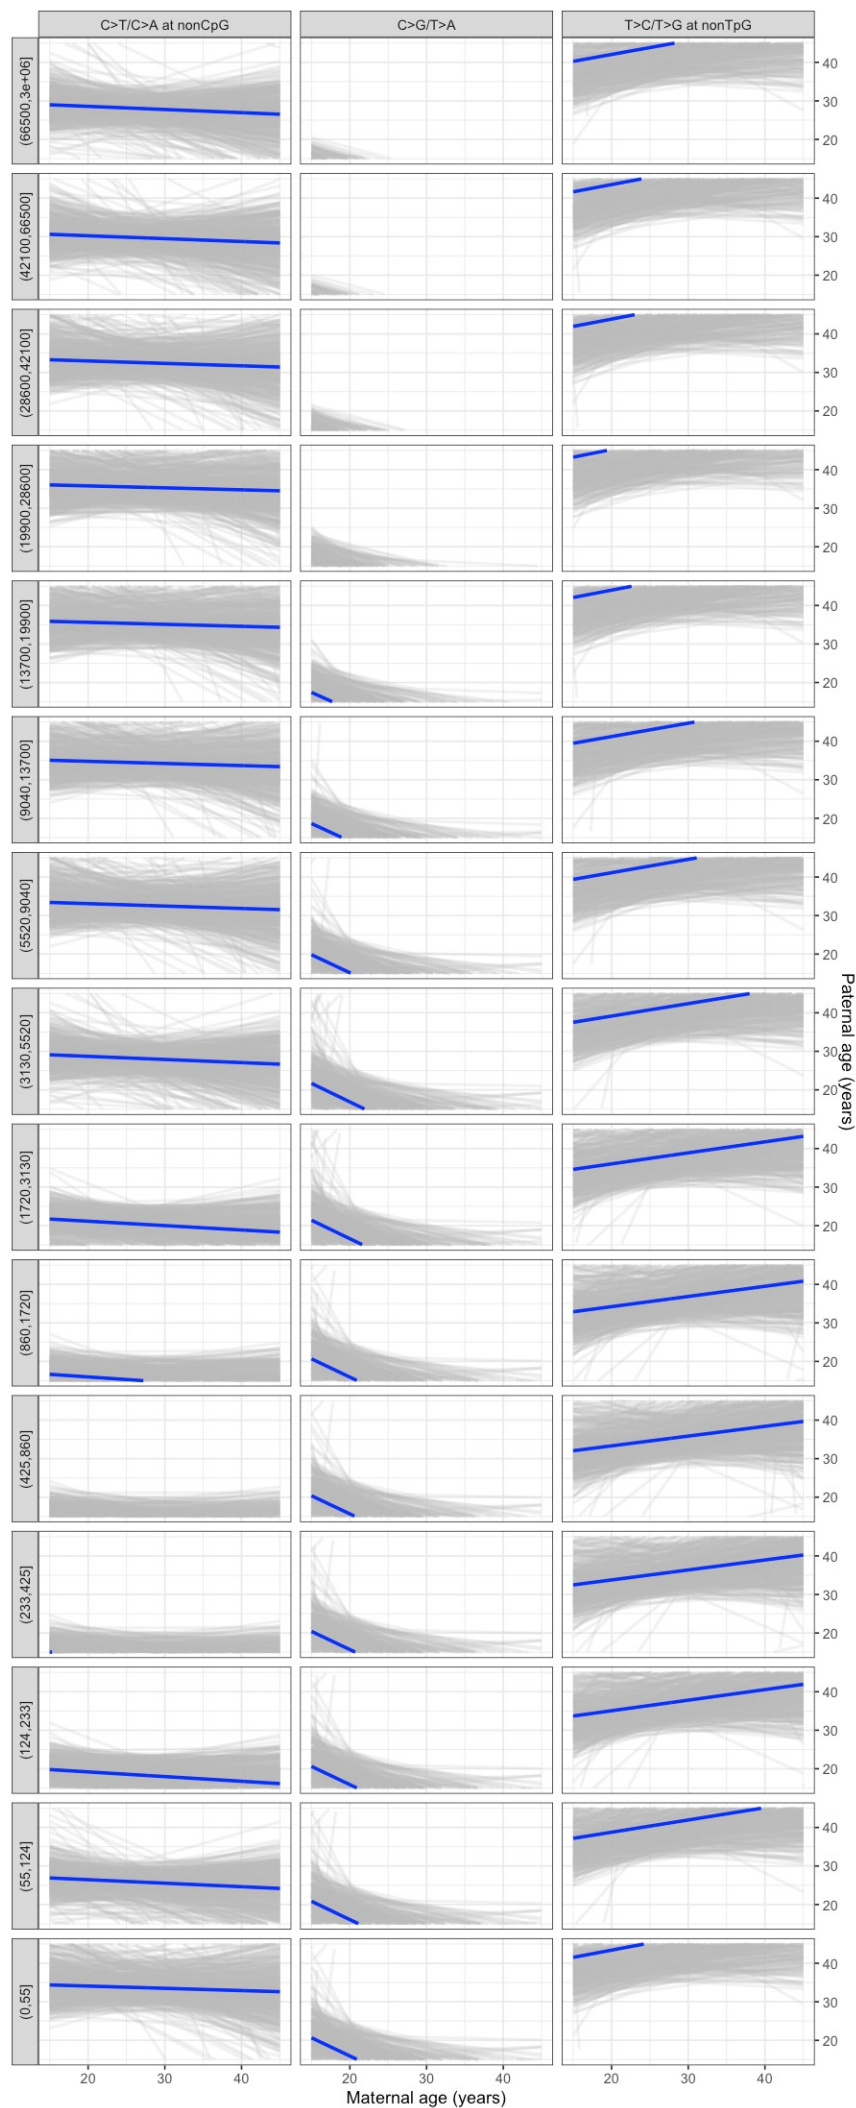

B.

Predicted paternal age (on x-axis)

Allele age (generations)

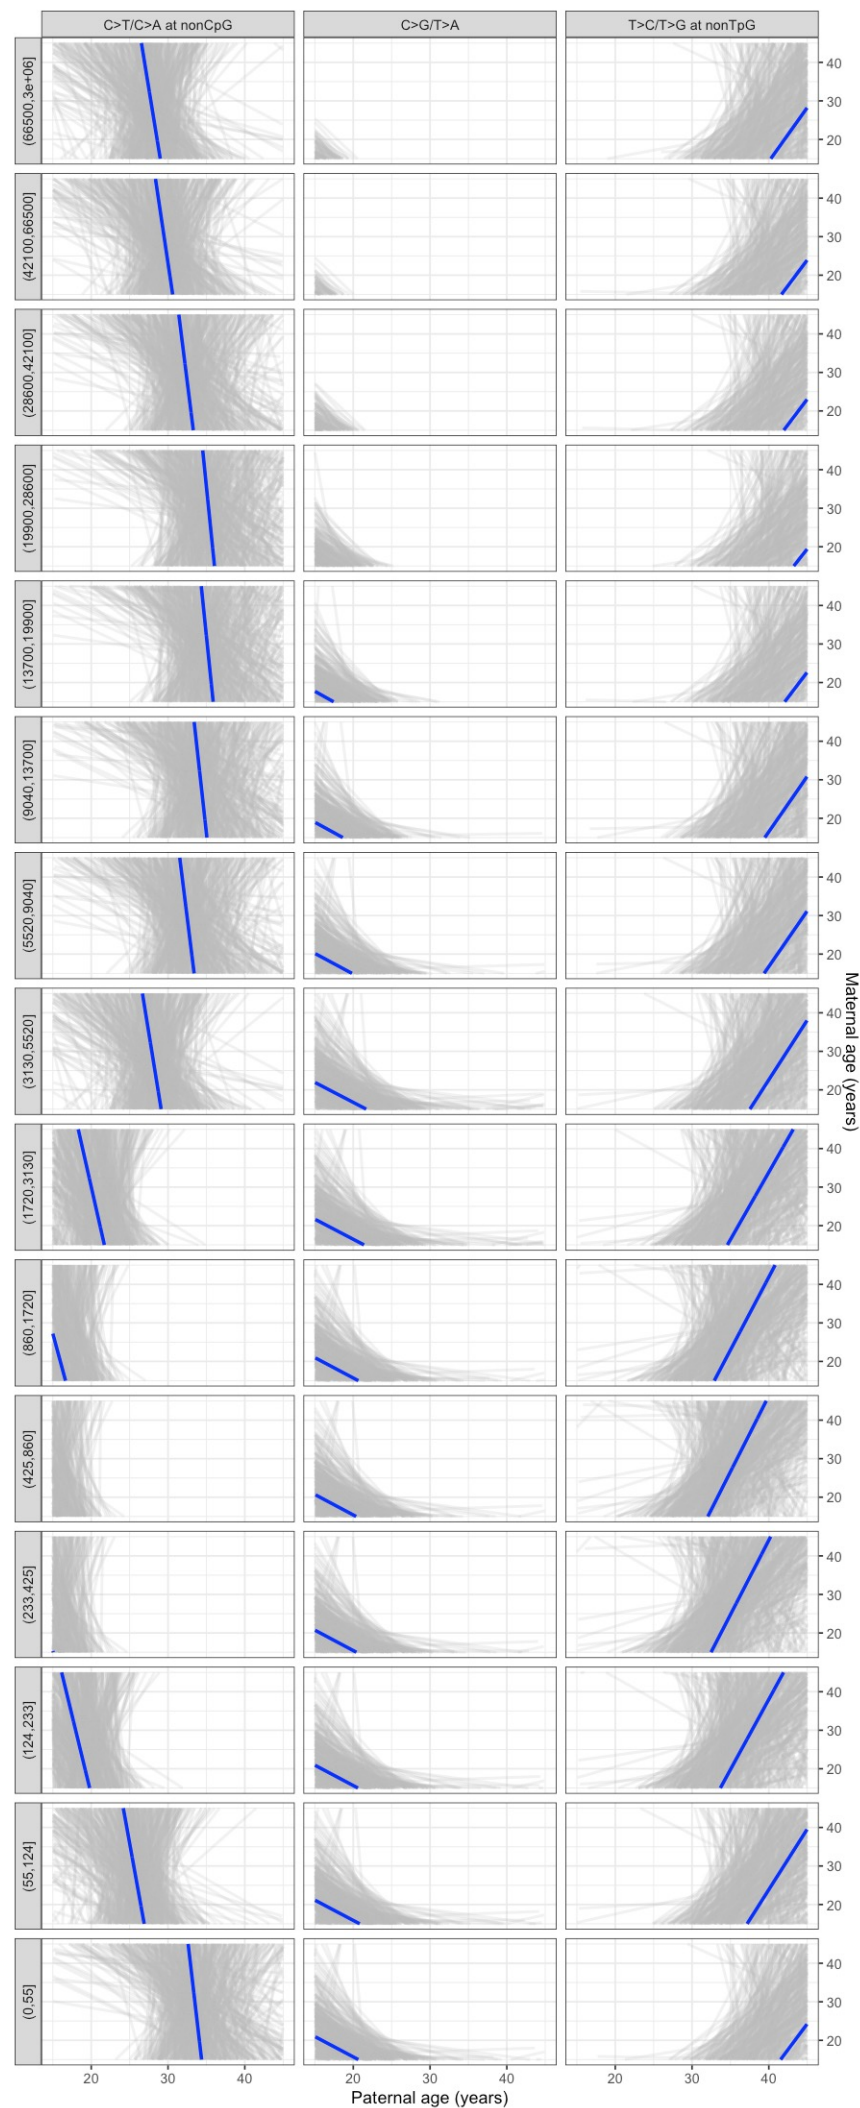

Supplement: supp [file elife-81188-supp-v1.zip › elife_poa_e81188_Figure_4_figure_supplement_3.pdf]
