# Supplementary material for: Limited role of generation time changes in driving the evolution of the mutation spectrum in humans
Source: eLife journal article supplement (doi:10.7554/elife.81188), 2023-02-13
Supplement: supp [file elife-81188-supp-v2.zip]

Archive with 32 entries (32 files):
- elife_poa_e81188_Figure_1_figure_supplement_1.pdf
- elife_poa_e81188_Figure_1_figure_supplement_2.pdf
- elife_poa_e81188_Figure_1_figure_supplement_3.pdf
- elife_poa_e81188_Figure_1_figure_supplement_4.jpg
- elife_poa_e81188_Figure_1_figure_supplement_5.pdf
- elife_poa_e81188_Figure_1_figure_supplement_6.pdf
- elife_poa_e81188_Figure_1_figure_supplement_7.pdf
- elife_poa_e81188_Figure_1_figure_supplement_8.pdf
- elife_poa_e81188_Figure_2_figure_supplement_1.pdf
- elife_poa_e81188_Figure_2_figure_supplement_2.pdf
- elife_poa_e81188_Figure_2_figure_supplement_3.pdf
- elife_poa_e81188_Figure_2_figure_supplement_4.pdf
- elife_poa_e81188_Figure_2_figure_supplement_5.pdf
- elife_poa_e81188_Figure_2_figure_supplement_6.pdf
- elife_poa_e81188_Figure_2_figure_supplement_7.pdf
- elife_poa_e81188_Figure_2_figure_supplement_8.pdf
- elife_poa_e81188_Figure_2_figure_supplement_9.pdf
- elife_poa_e81188_Figure_2_figure_supplement_10.pdf
- elife_poa_e81188_Figure_2_figure_supplement_11.pdf
- elife_poa_e81188_Figure_2_figure_supplement_12.pdf
- elife_poa_e81188_FFigure_2_figure_supplement_13.pdf
- elife_poa_e81188_Figure_3_figure_supplement_1.pdf
- elife_poa_e81188_Figure_3_figure_supplement_2.pdf
- elife_poa_e81188_Figure_3_figure_supplement_3.pdf
- elife_poa_e81188_Figure_3_figure_supplement_4.pdf
- elife_poa_e81188_Figure_4_figure_supplement_1.pdf
- elife_poa_e81188_Figure_4_figure_supplement_2.pdf
- elife_poa_e81188_Figure_4_figure_supplement_3.pdf
- elife_poa_e81188_Figure_1_source_data_1.zip
- elife_poa_e81188_Figure_2_source_data_1.zip
- elife_poa_e81188_Figure_3_source_data_1.zip
- elife_poa_e81188_Figure_4_source_data_1.zip
