# Supplementary figures and images for: Limited role of generation time changes in driving the evolution of the mutation spectrum in humans
Source: eLife journal article supplement (doi:10.7554/elife.81188), 2023-02-13

Allele age (generations)

YRI

CEU

CHB

LWK

TSI

JPT

Mutation type

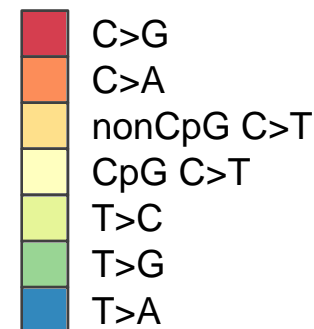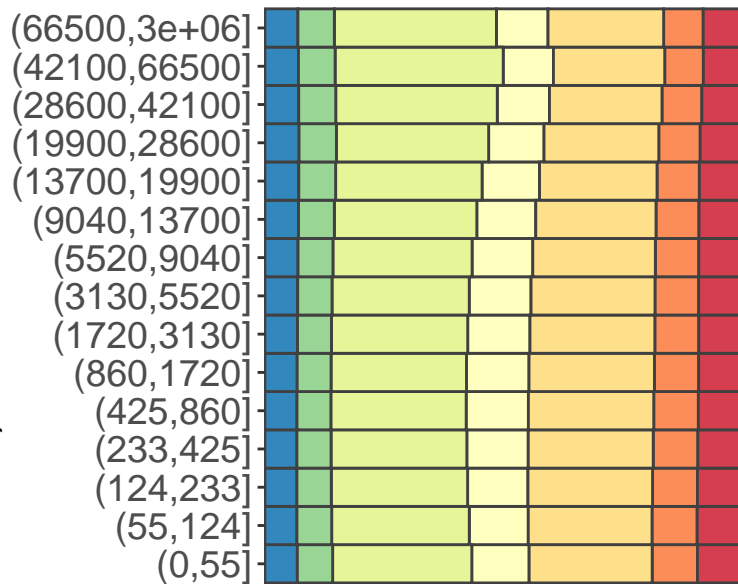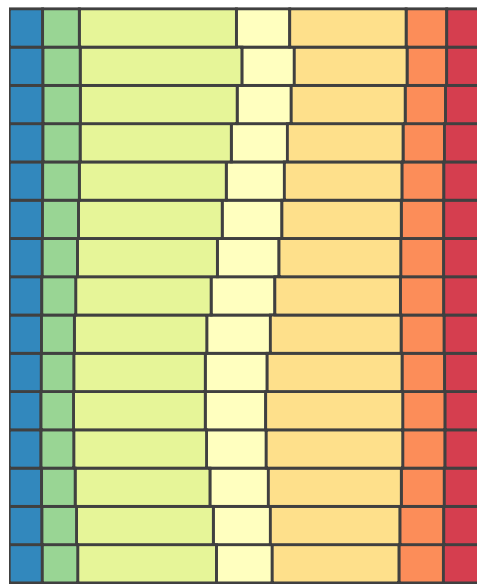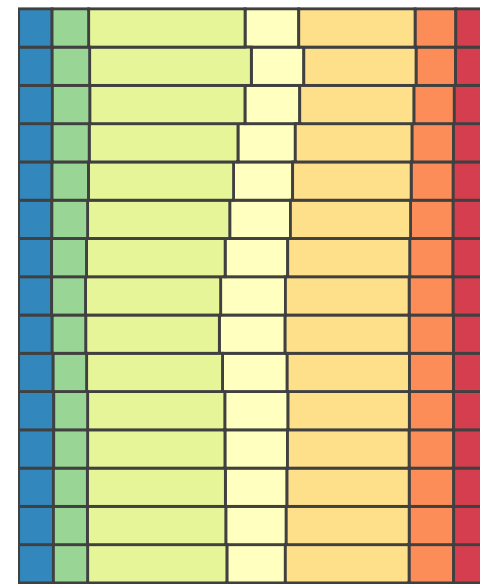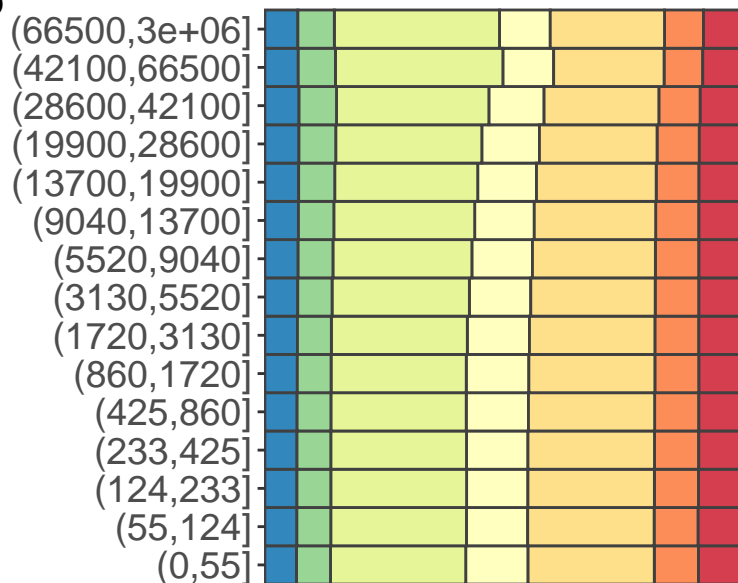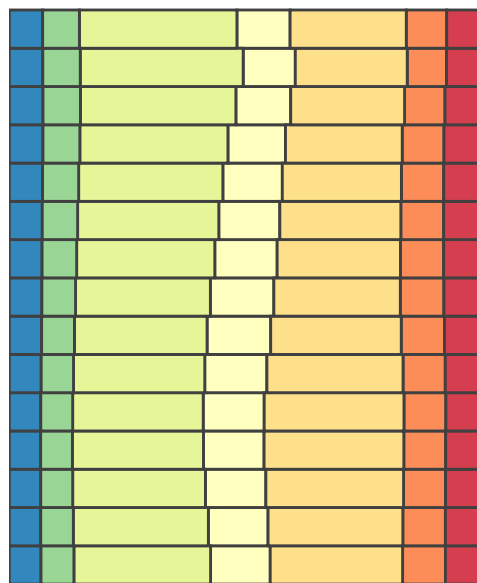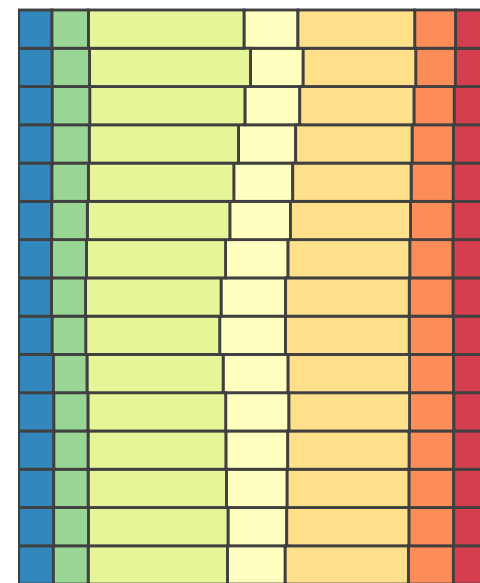

0.00 0.25 0.50 0.75 1.00

0.00 0.25 0.50 0.75 1.00

0.00 0.25 0.50 0.75 1.00

Fraction

Supplement: supp [file elife-81188-supp-v1.zip › elife_poa_e81188_Figure_1_figure_supplement_1.pdf]

Allele age (generations)

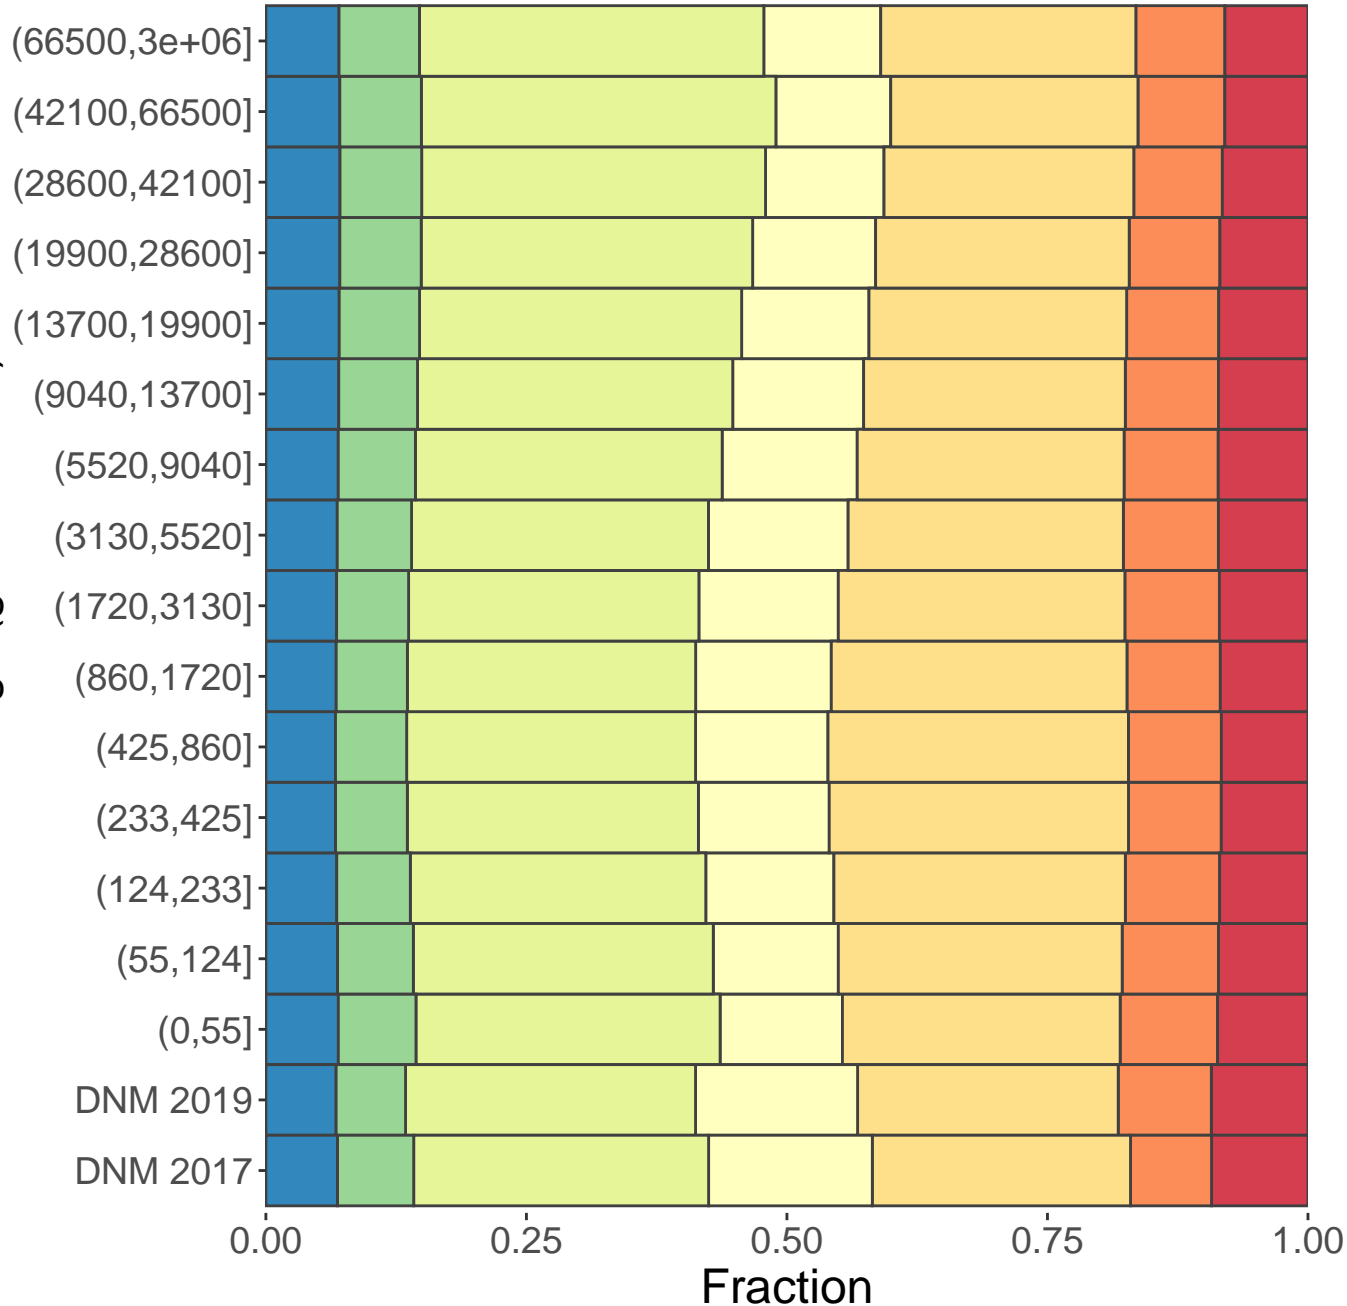

Mutation type

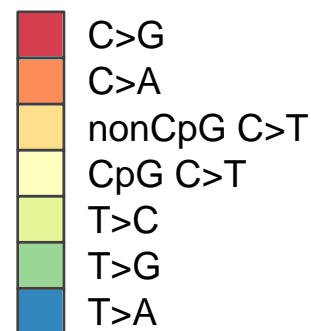

Supplement: supp [file elife-81188-supp-v1.zip › elife_poa_e81188_Figure_1_figure_supplement_2.pdf]

Allele age (generations)

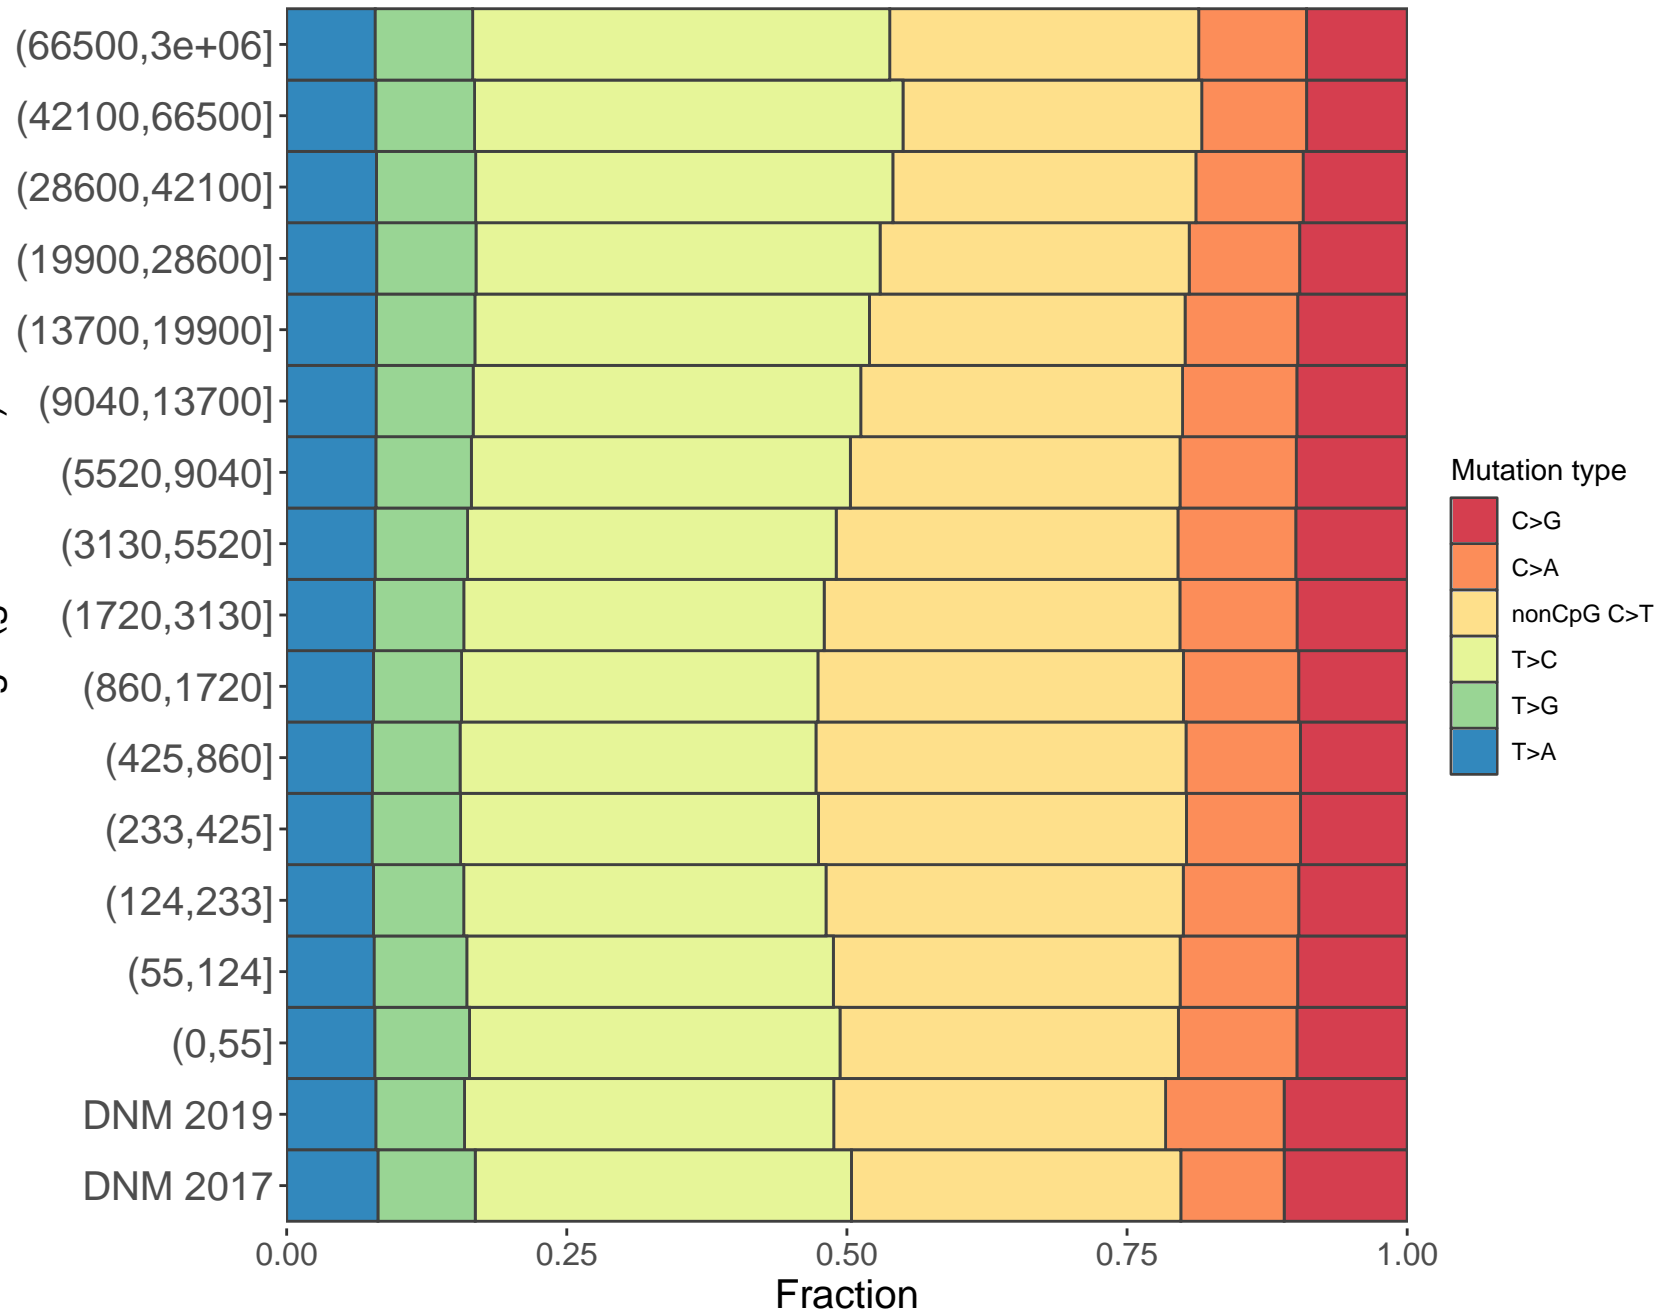

Supplement: supp [file elife-81188-supp-v1.zip › elife_poa_e81188_Figure_1_figure_supplement_3.pdf]

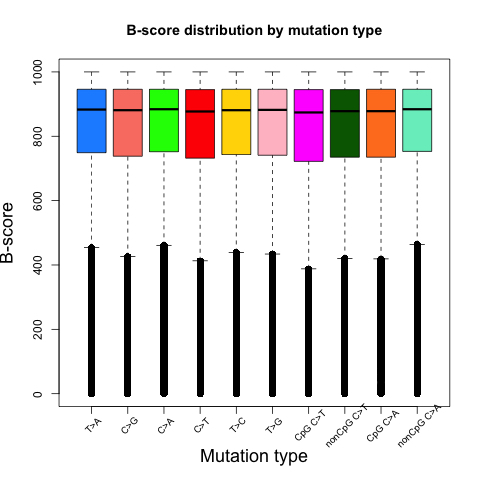

Supplement: supp [file elife-81188-supp-v1.zip › elife_poa_e81188_Figure_1_figure_supplement_4.jpg]

Allele age (generations)

YRI

CEU

CHB

LWK

TSI

JPT

Mutation type

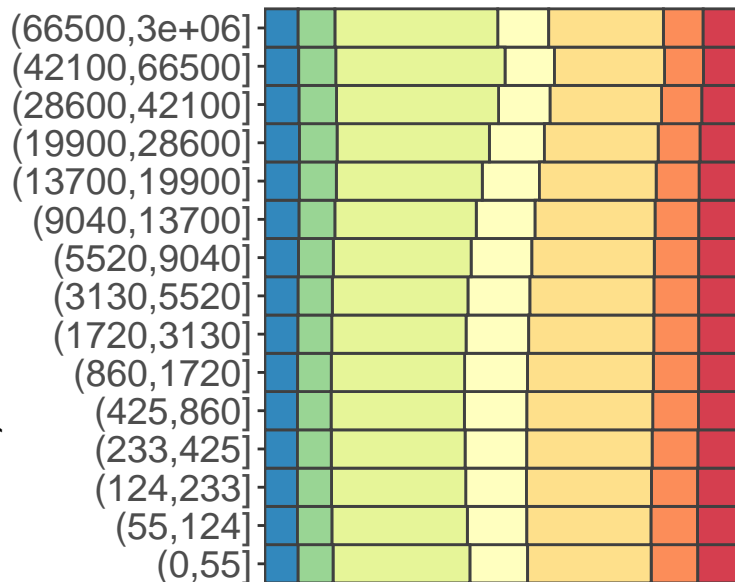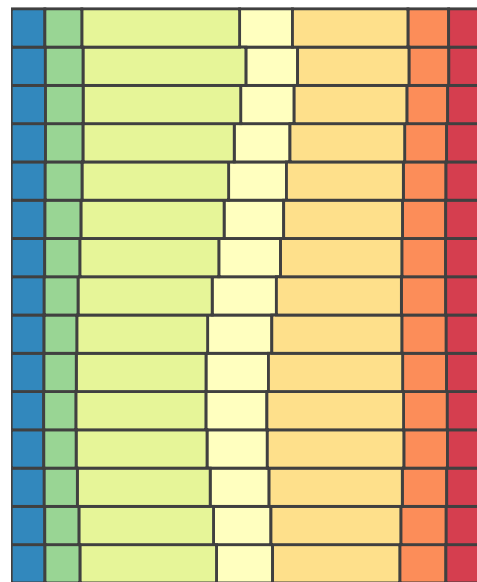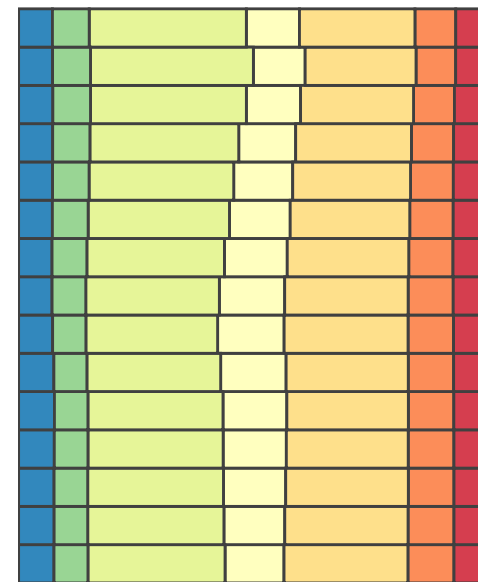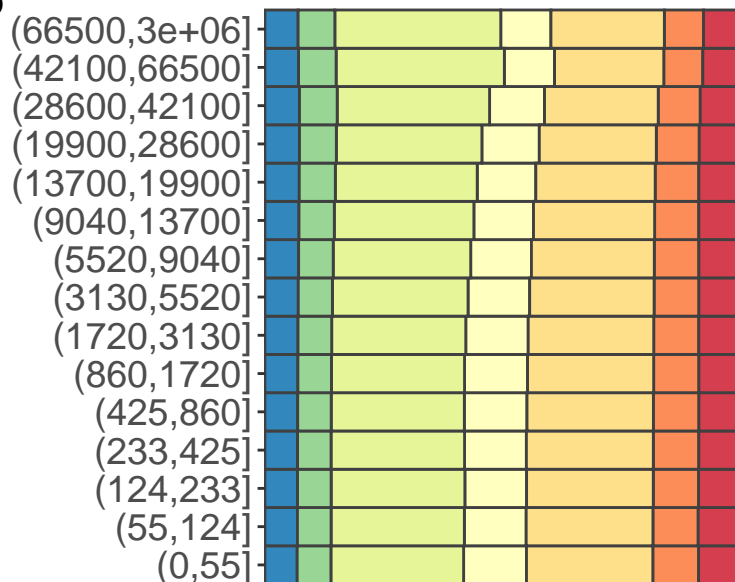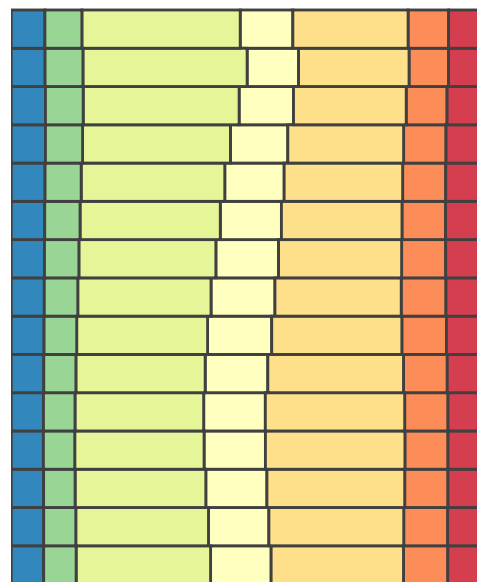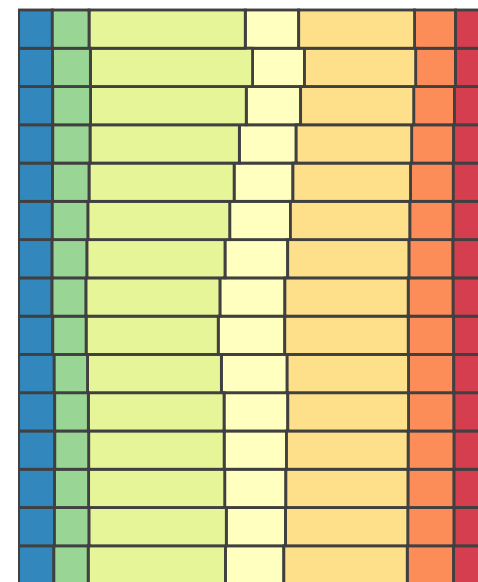

0.00 0.25 0.50 0.75 1.00

0.00 0.25 0.50 0.75 1.00

0.00 0.25 0.50 0.75 1.00

Fraction

Supplement: supp [file elife-81188-supp-v1.zip › elife_poa_e81188_Figure_1_figure_supplement_5.pdf]

A

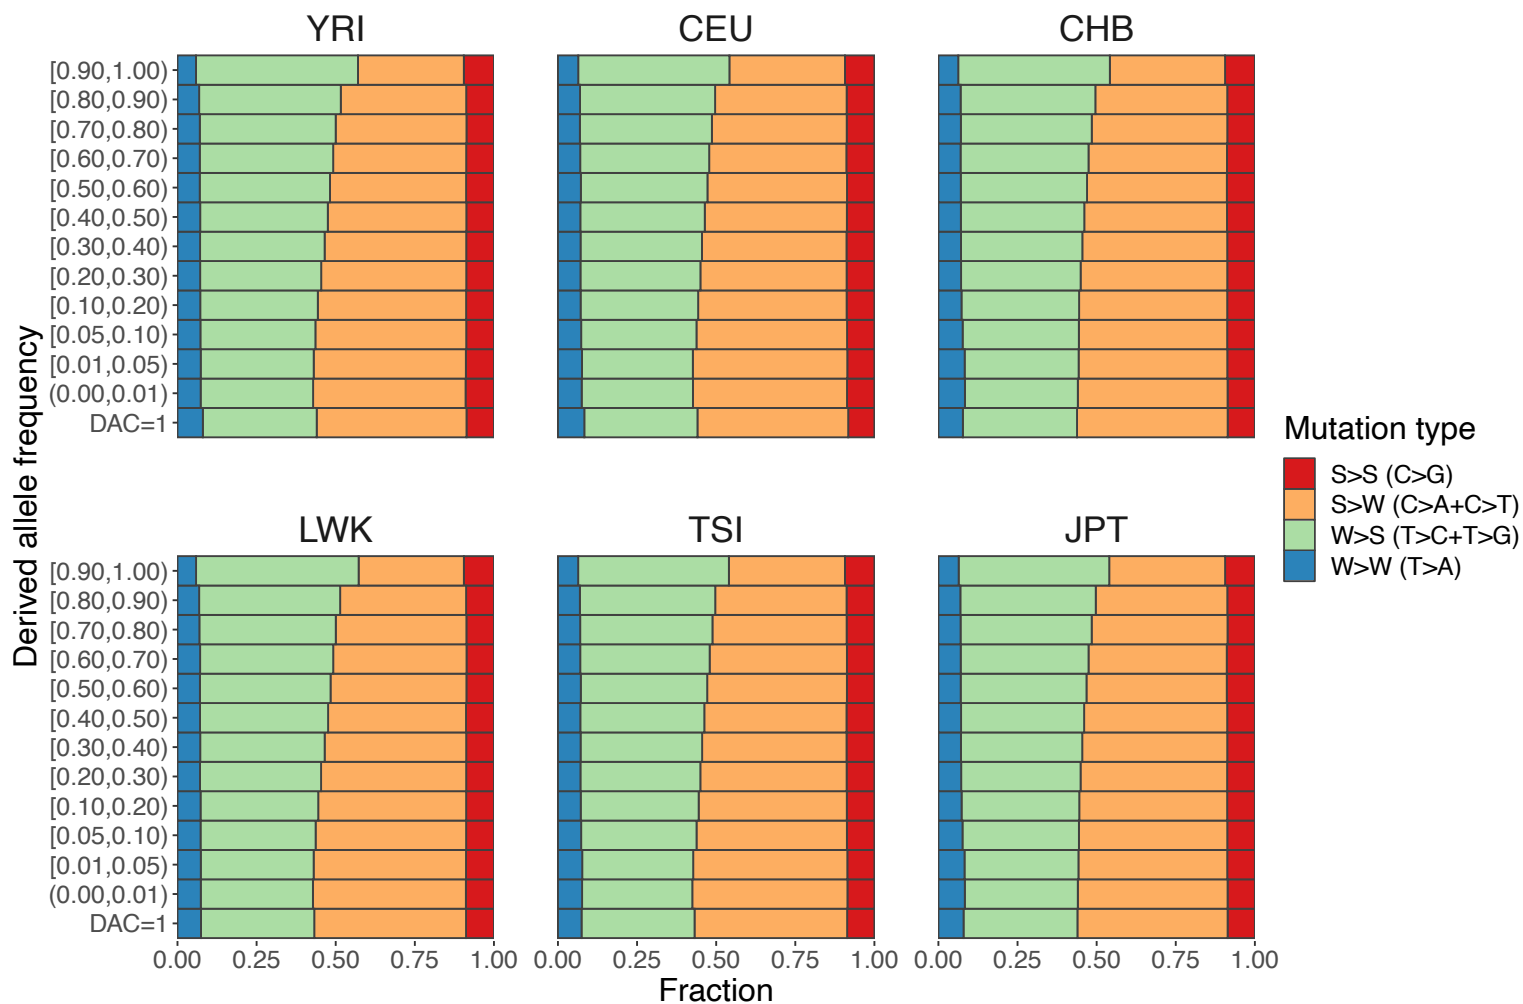

B

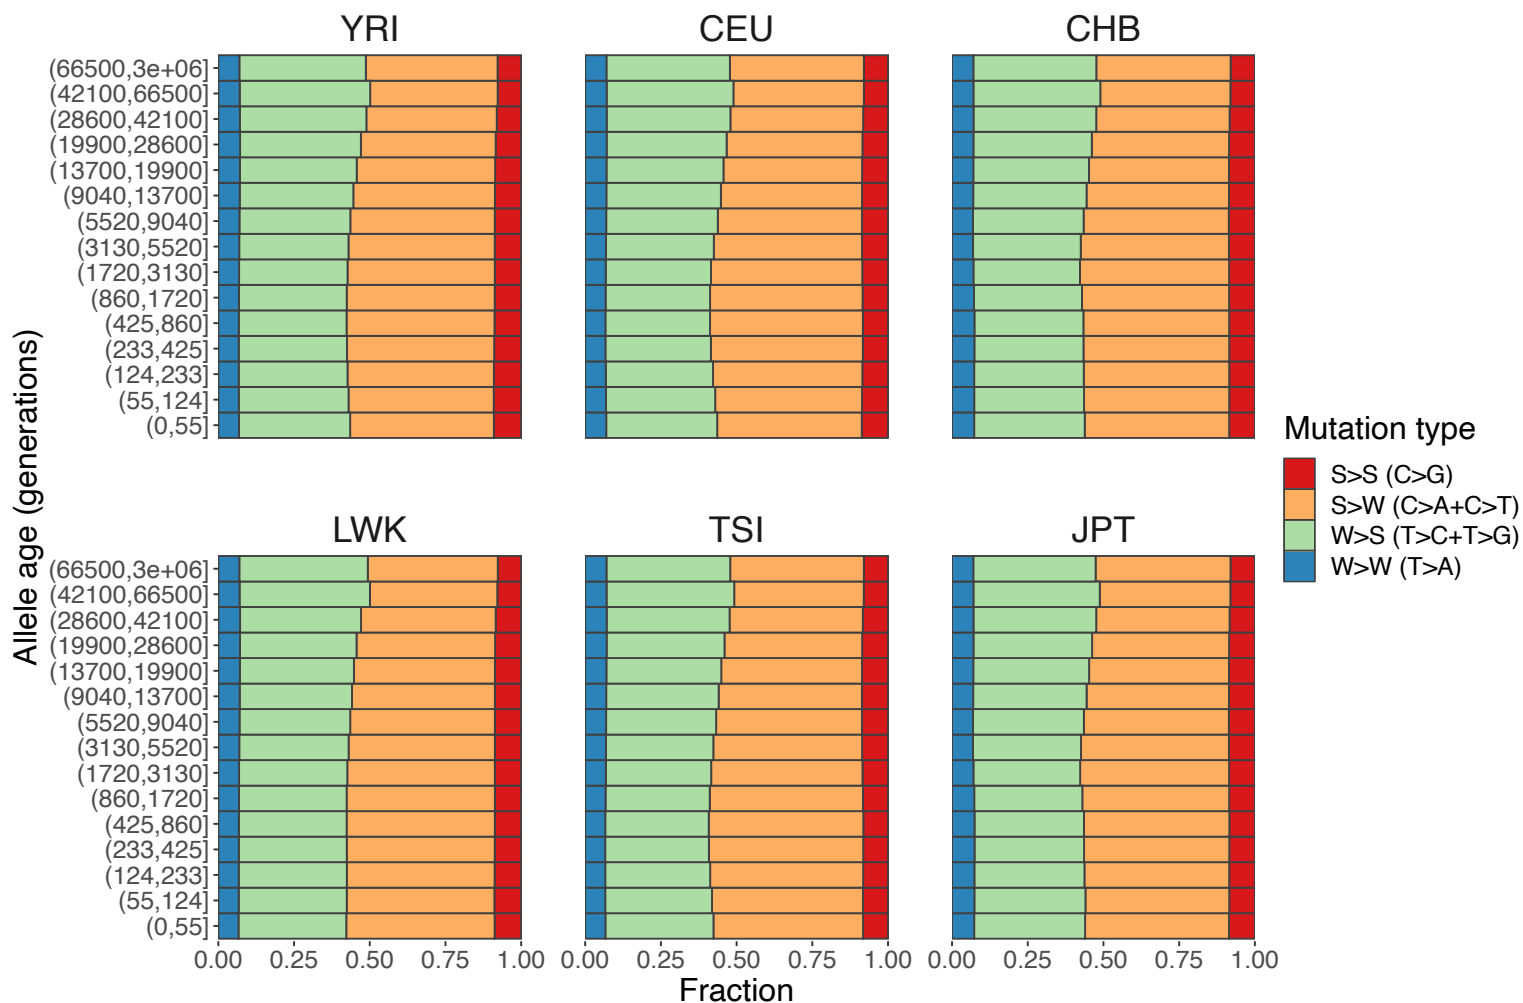

Supplement: supp [file elife-81188-supp-v1.zip › elife_poa_e81188_Figure_1_figure_supplement_6.pdf]

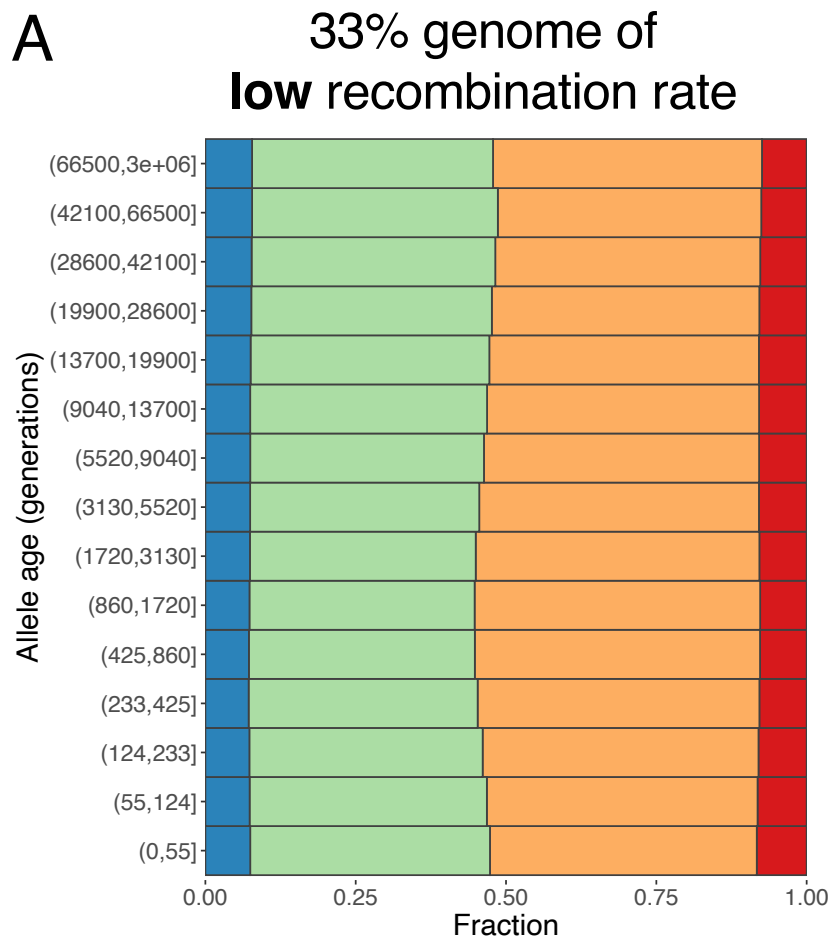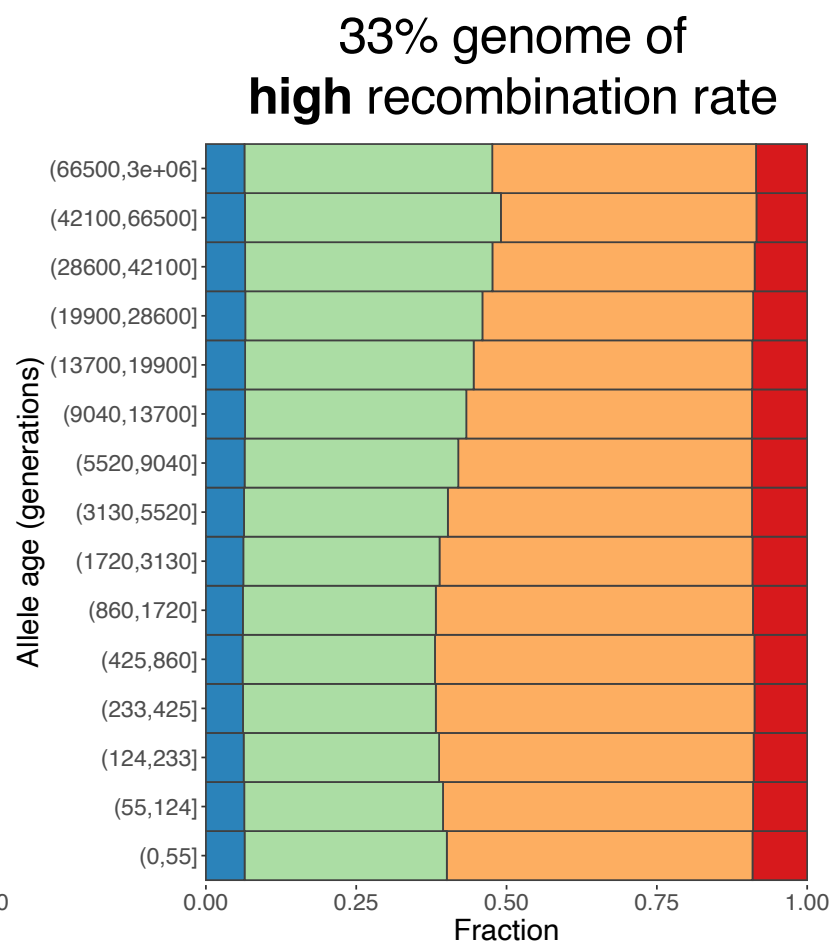

**B**

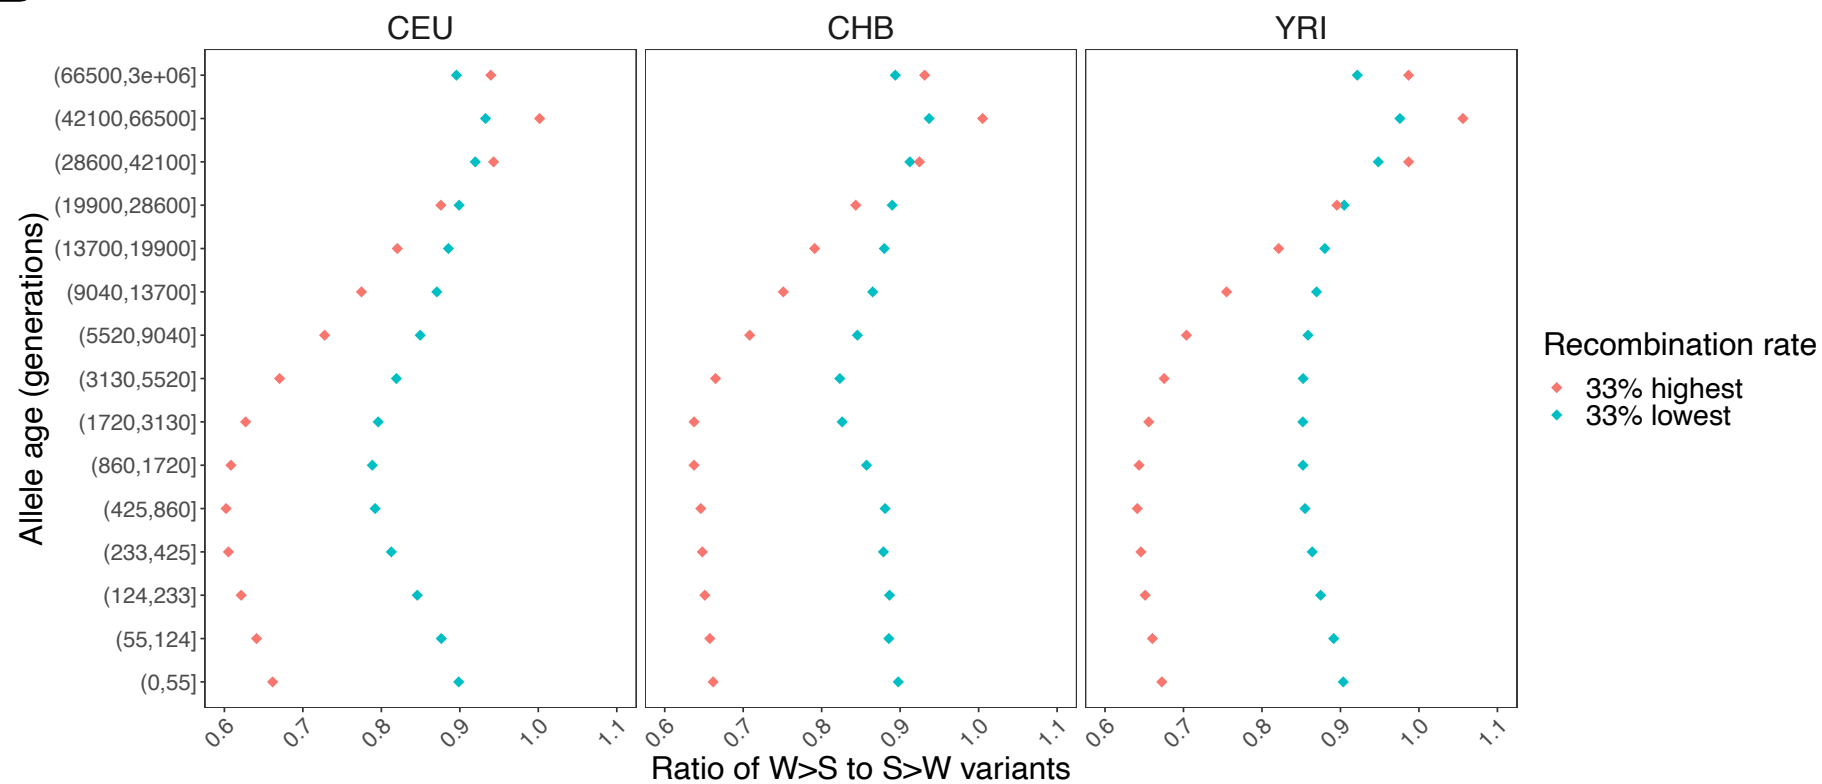

Supplement: supp [file elife-81188-supp-v1.zip › elife_poa_e81188_Figure_1_figure_supplement_7.pdf]

## A Age binning based on YRI variants

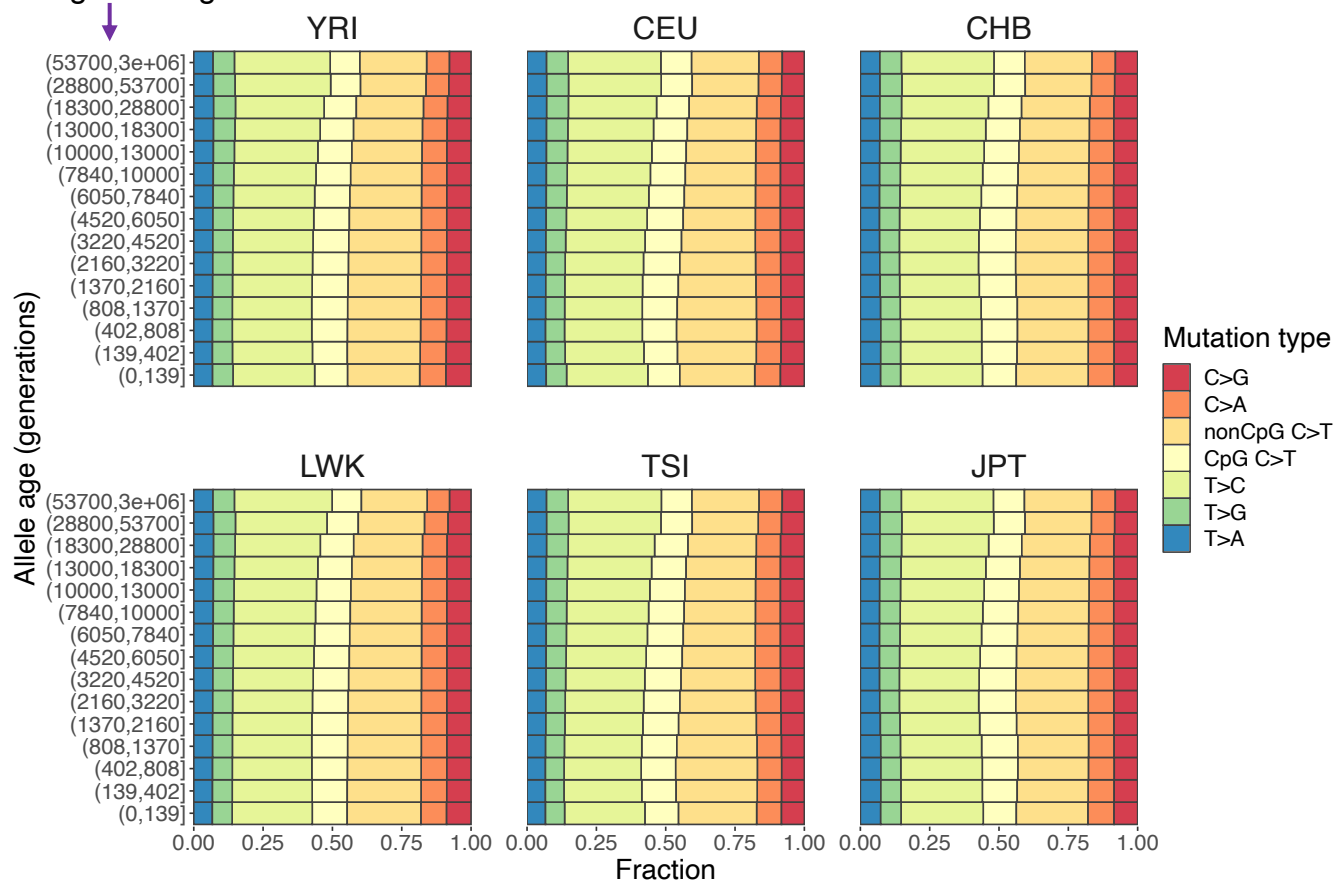

## B Age binning based on CHB variants

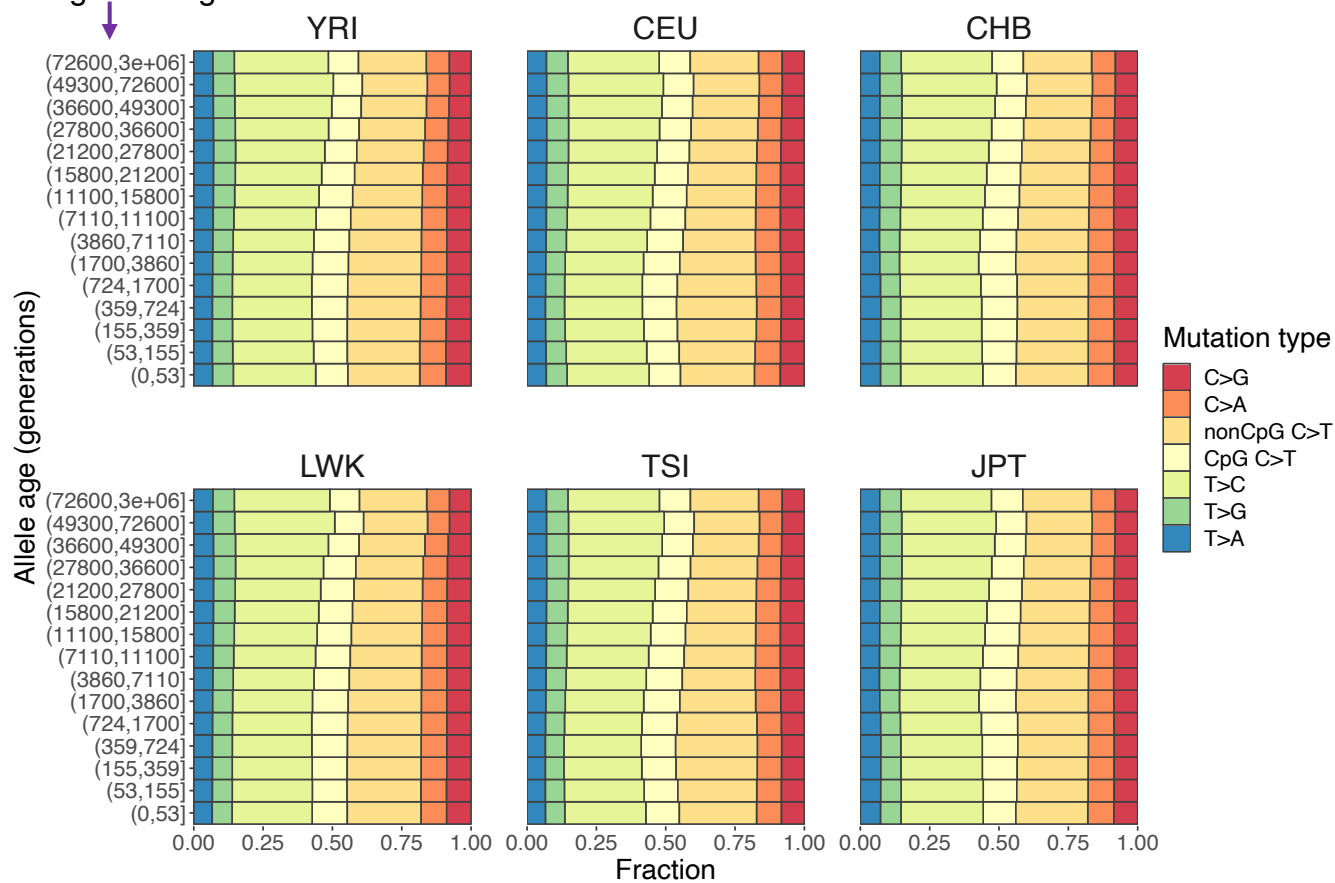

Supplement: supp [file elife-81188-supp-v1.zip › elife_poa_e81188_Figure_1_figure_supplement_8.pdf]

33% genome of  
**low** recombination  
rate

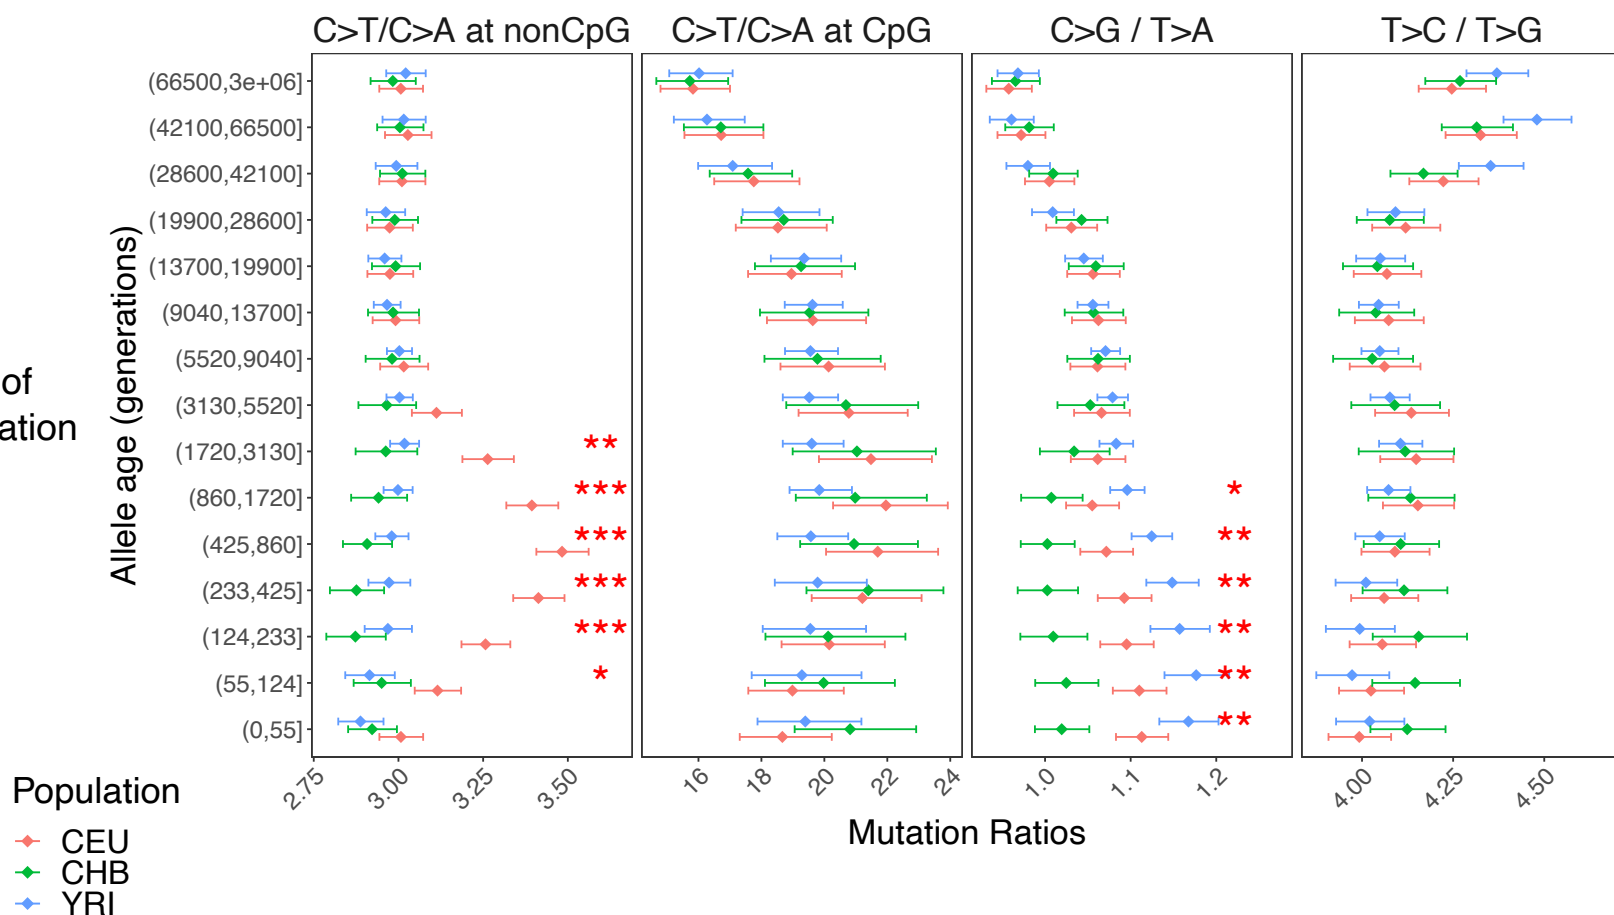

33% genome of  
**high** recombination  
rate

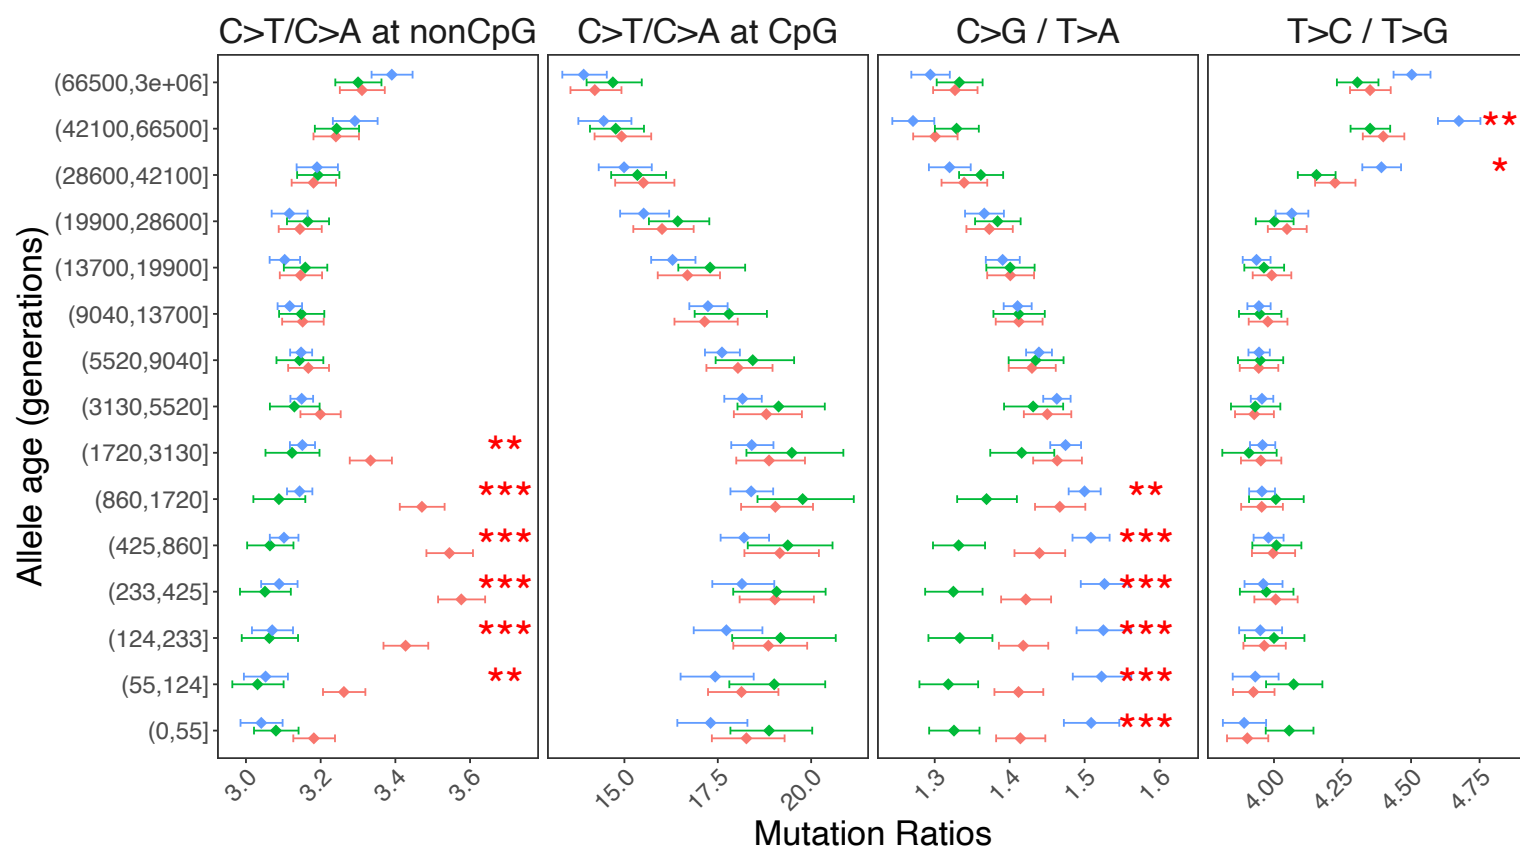

Supplement: supp [file elife-81188-supp-v1.zip › elife_poa_e81188_Figure_2_figure_supplement_3.pdf]

Derived allele frequency

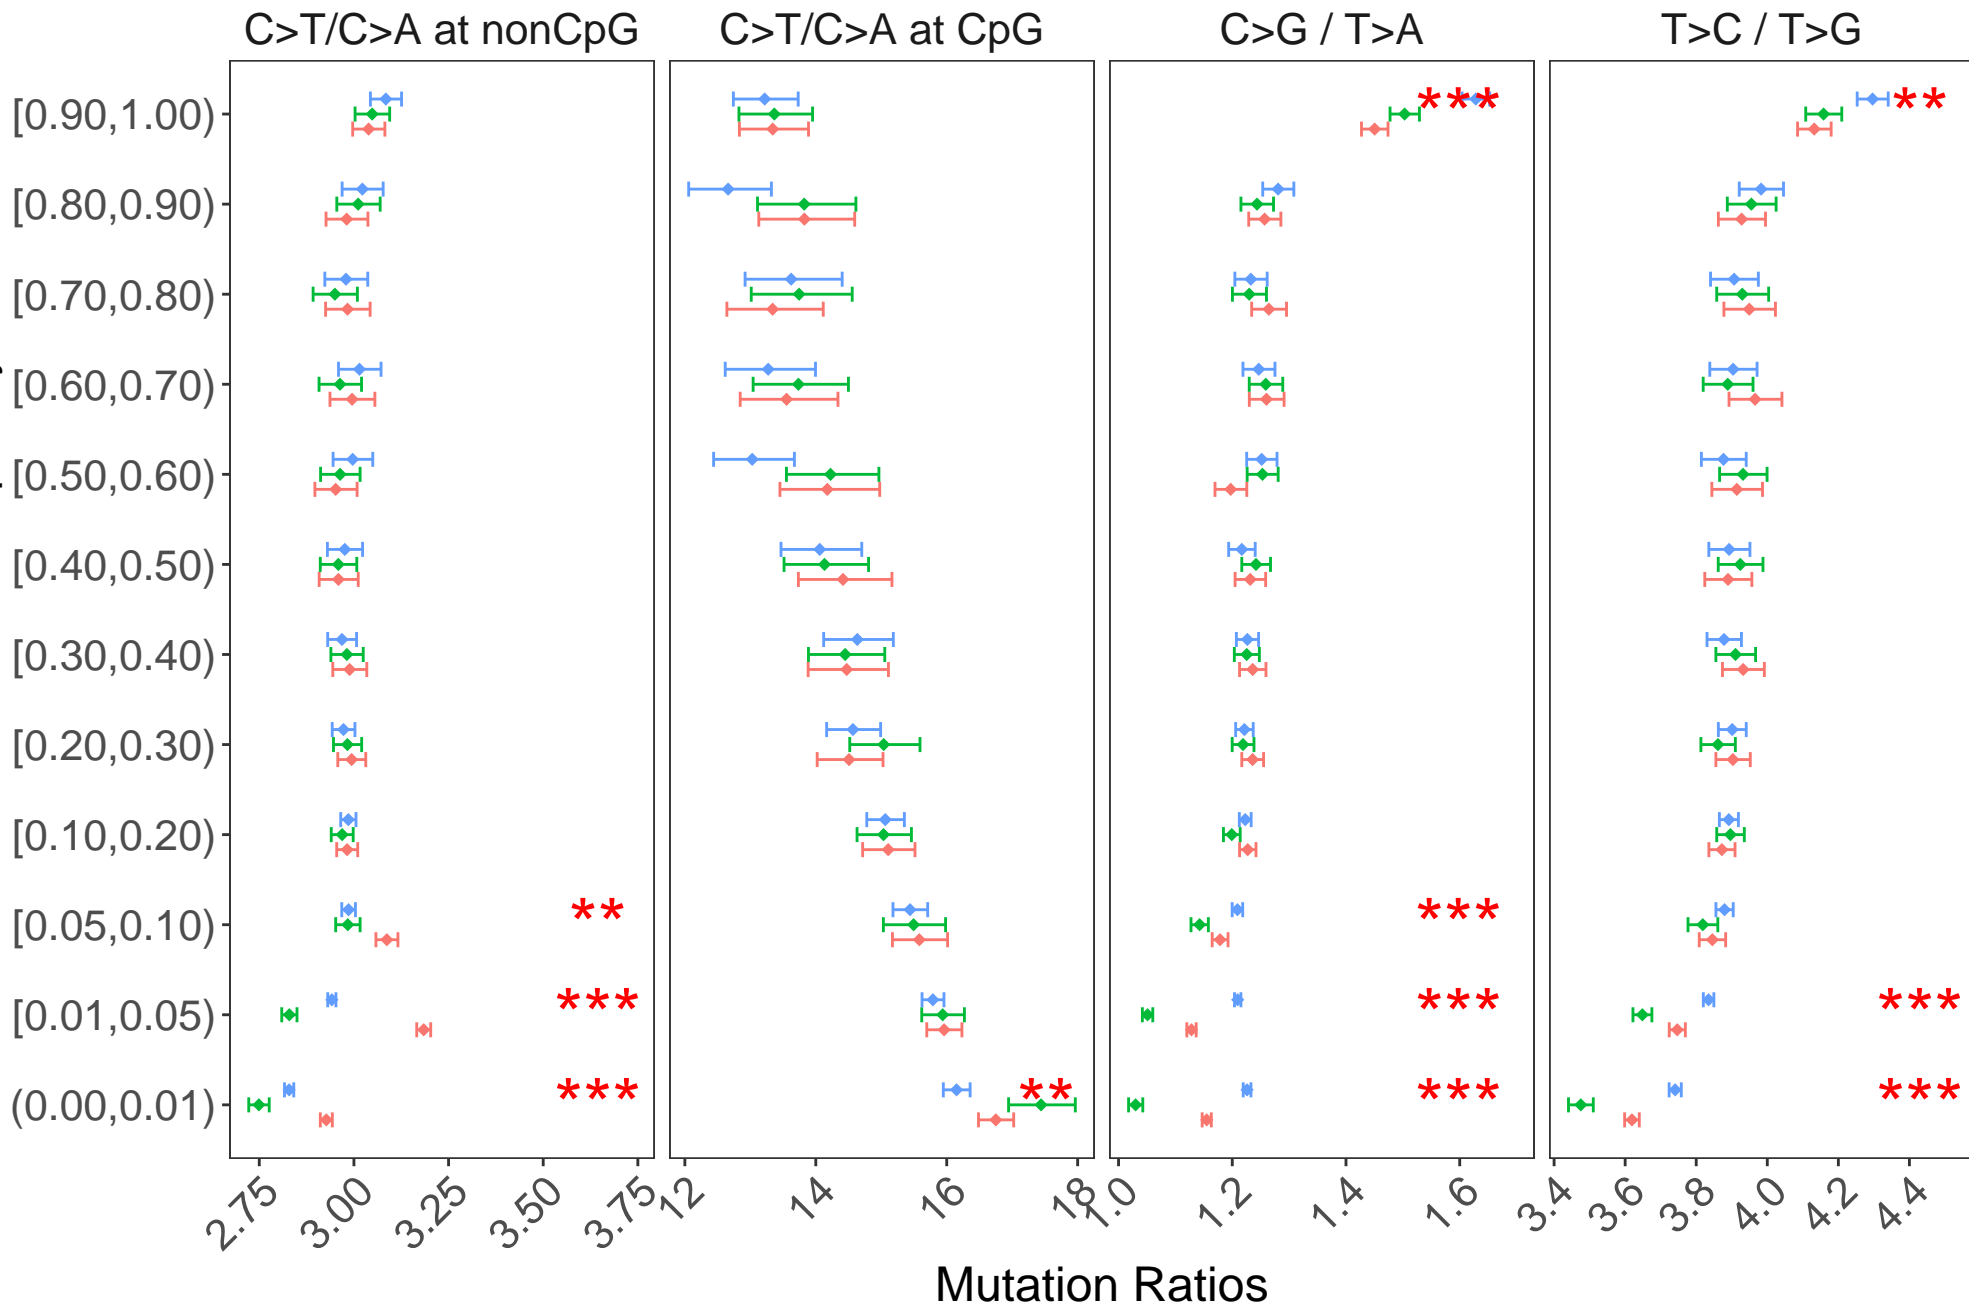

Supplement: supp [file elife-81188-supp-v1.zip › elife_poa_e81188_Figure_2_figure_supplement_4.pdf]

## A Age binning based on YRI variants

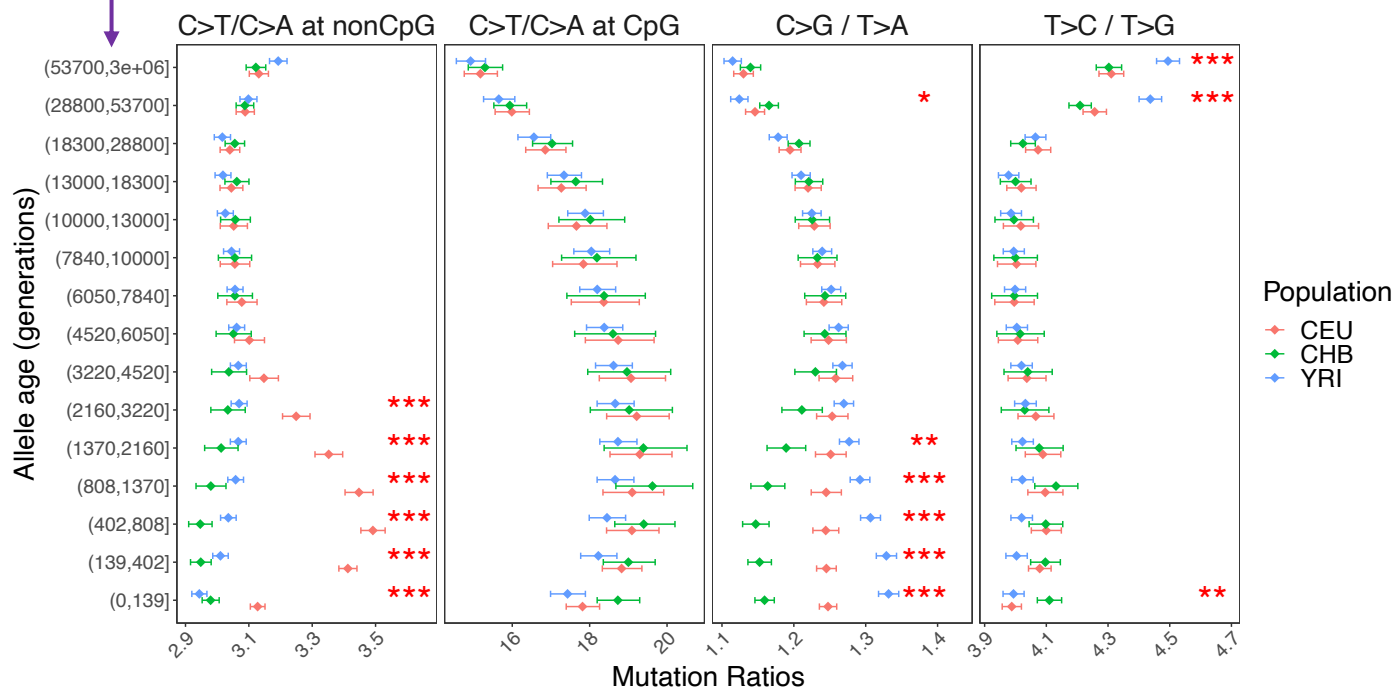

## B Age binning based on CHB variants

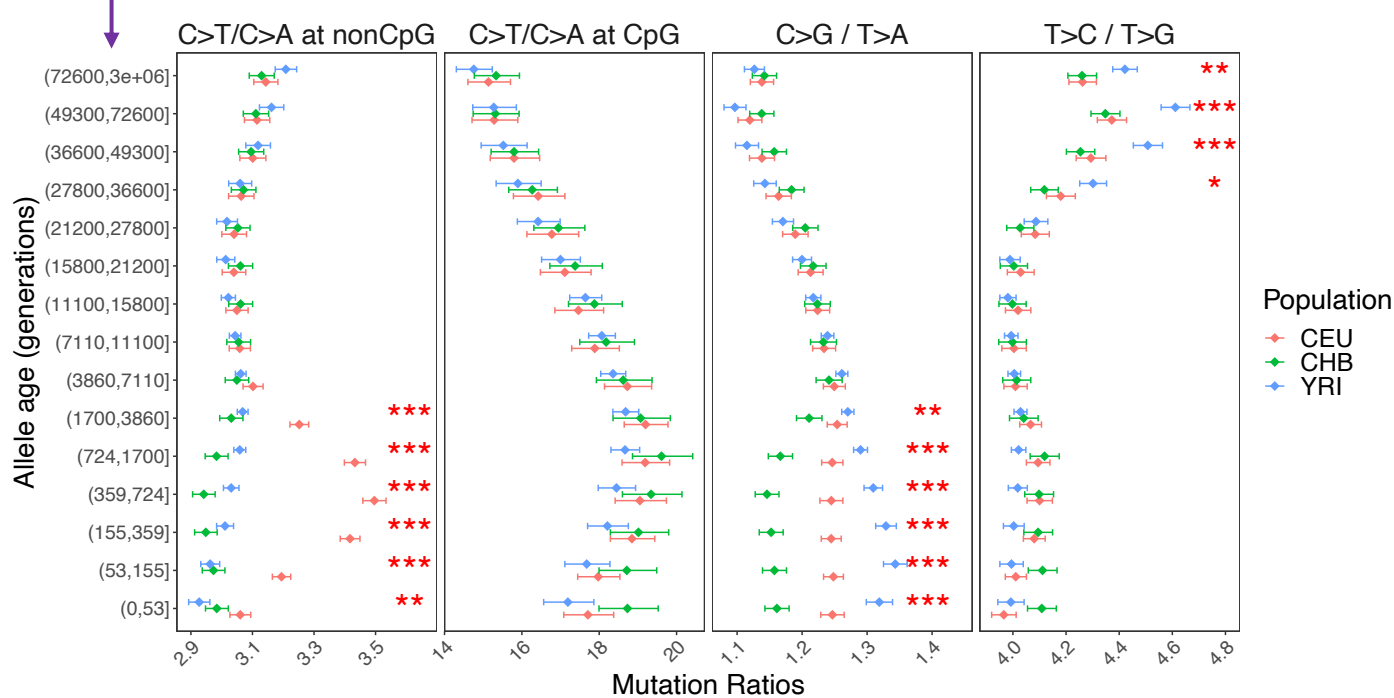

Supplement: supp [file elife-81188-supp-v1.zip › elife_poa_e81188_Figure_2_figure_supplement_5.pdf]

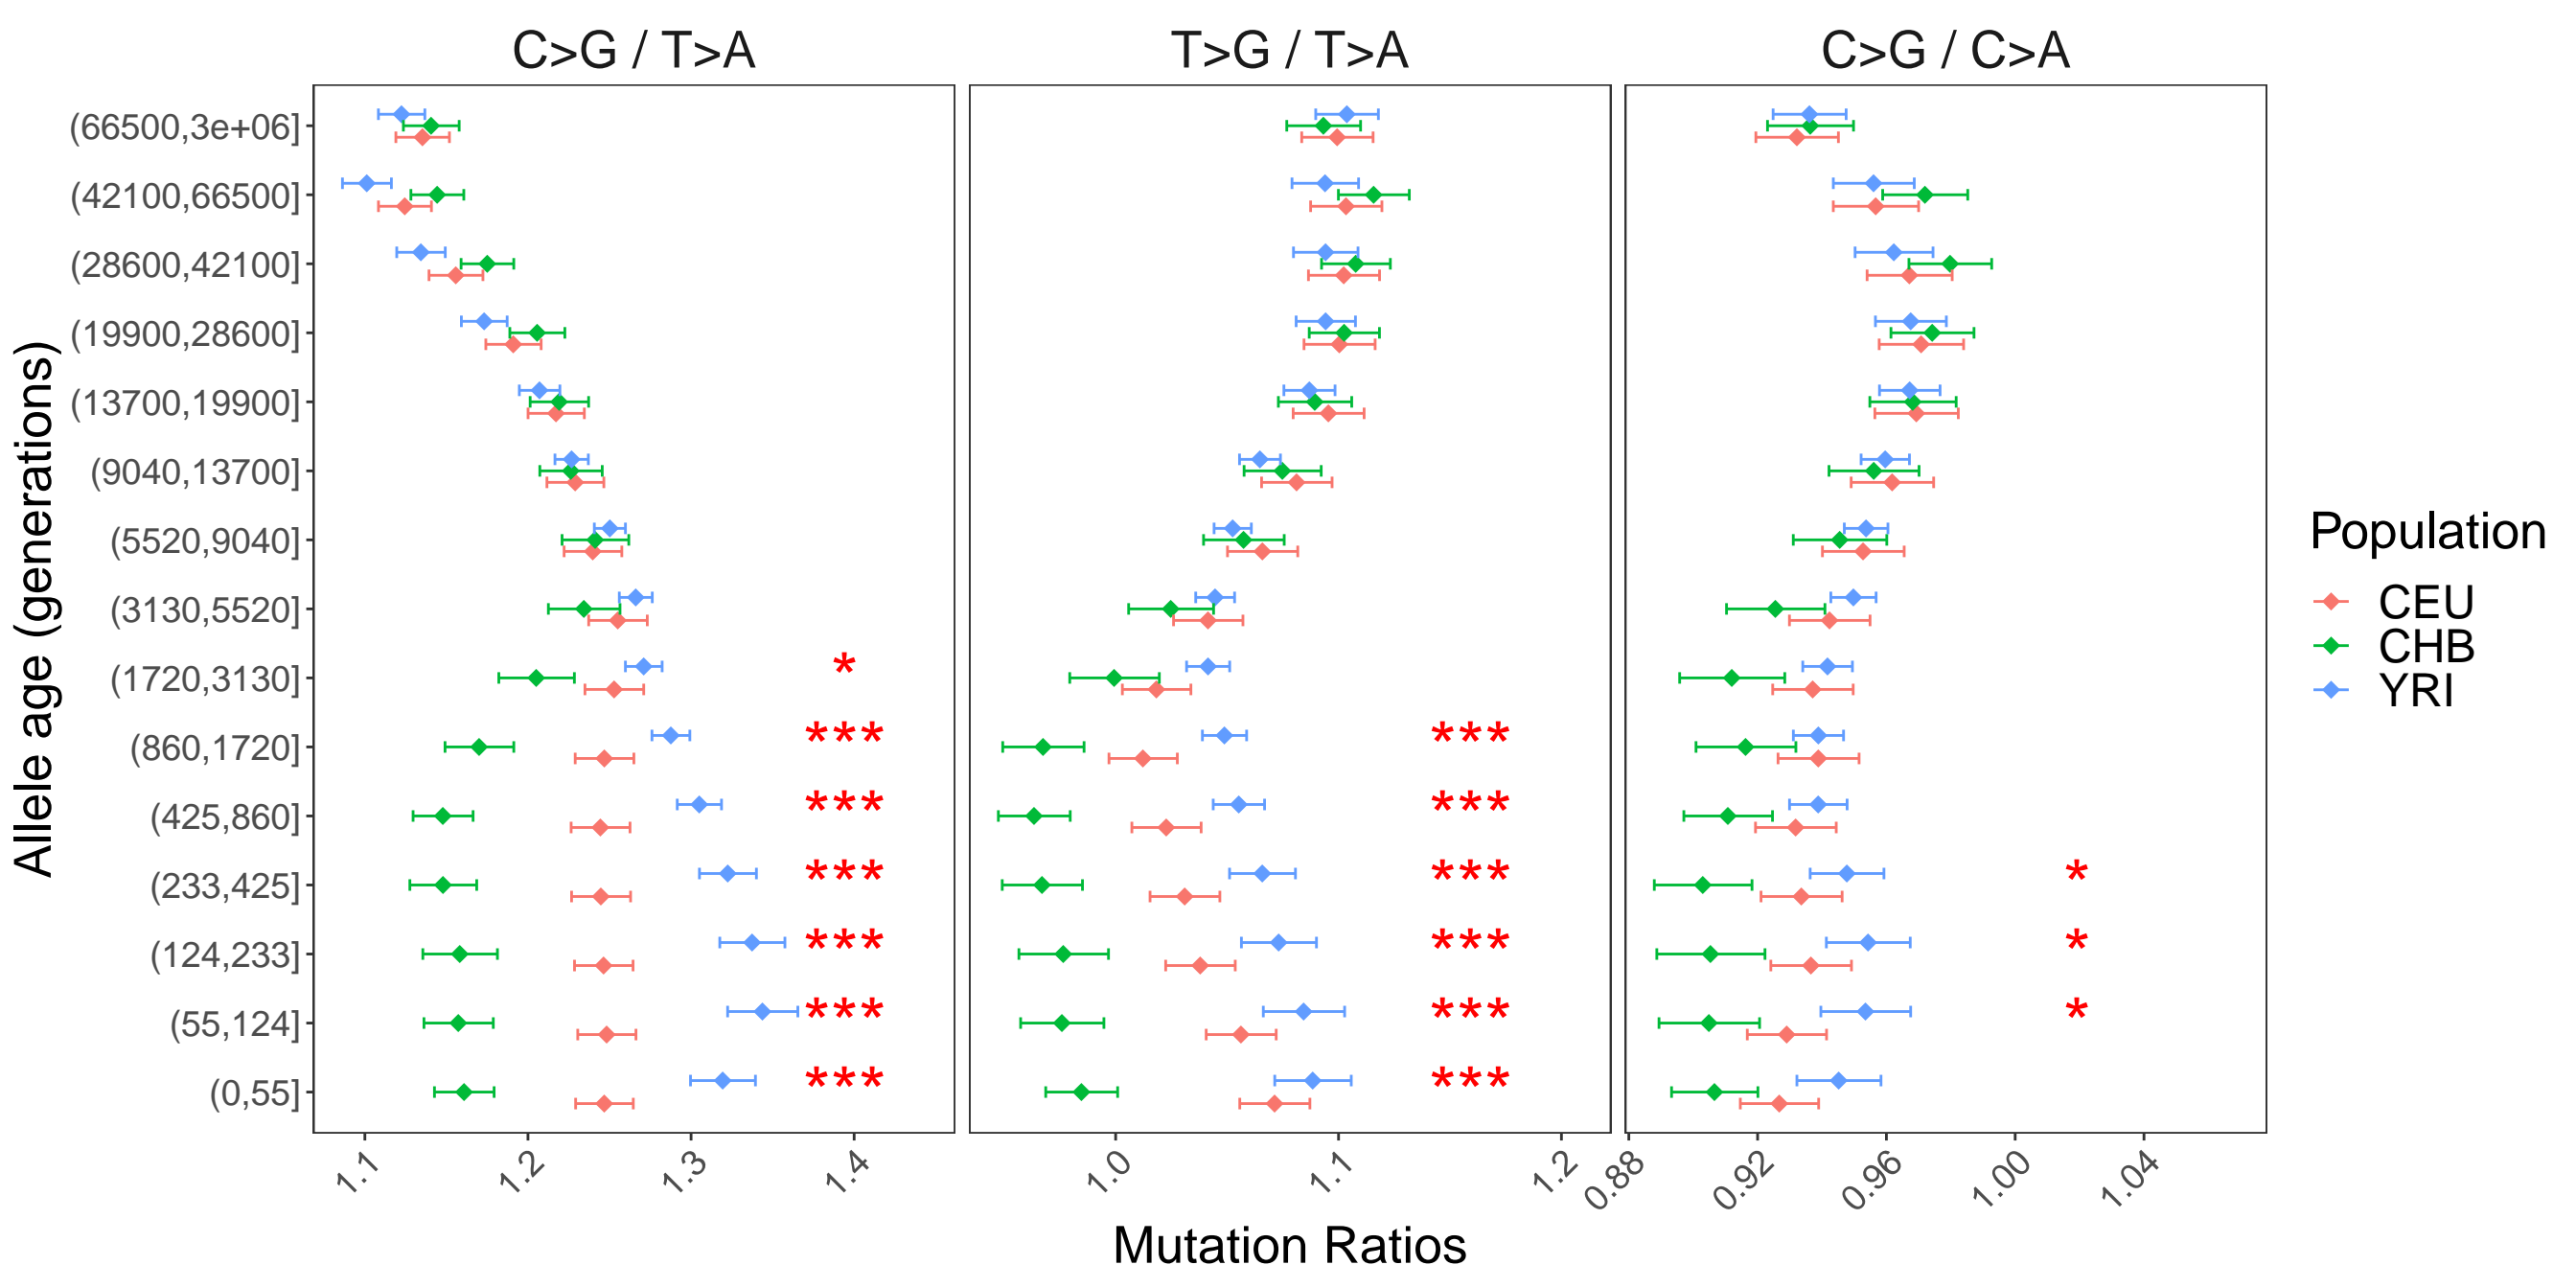

Supplement: supp [file elife-81188-supp-v1.zip › elife_poa_e81188_Figure_2_figure_supplement_6.pdf]

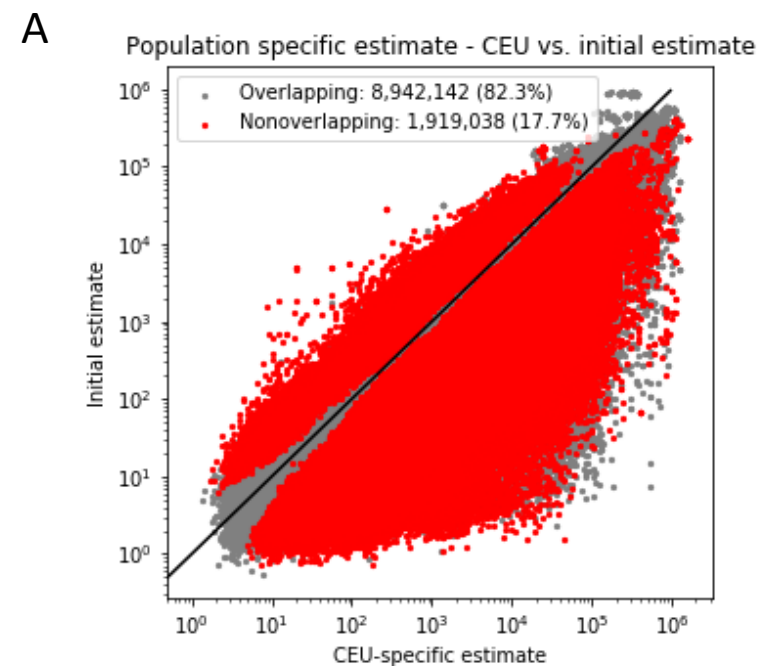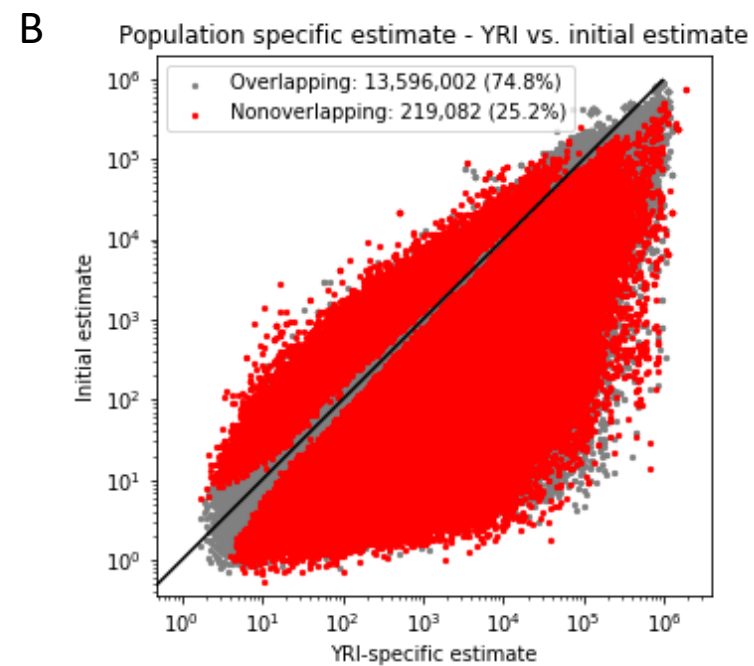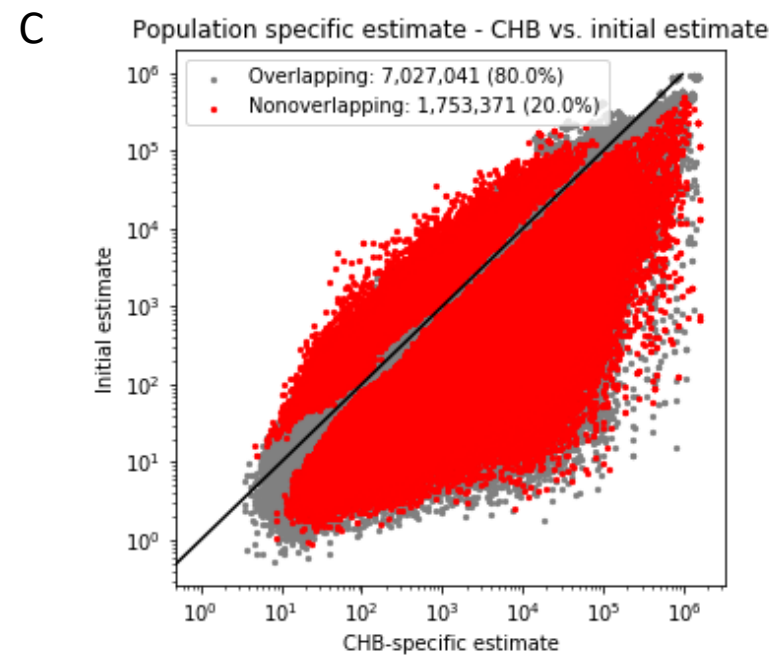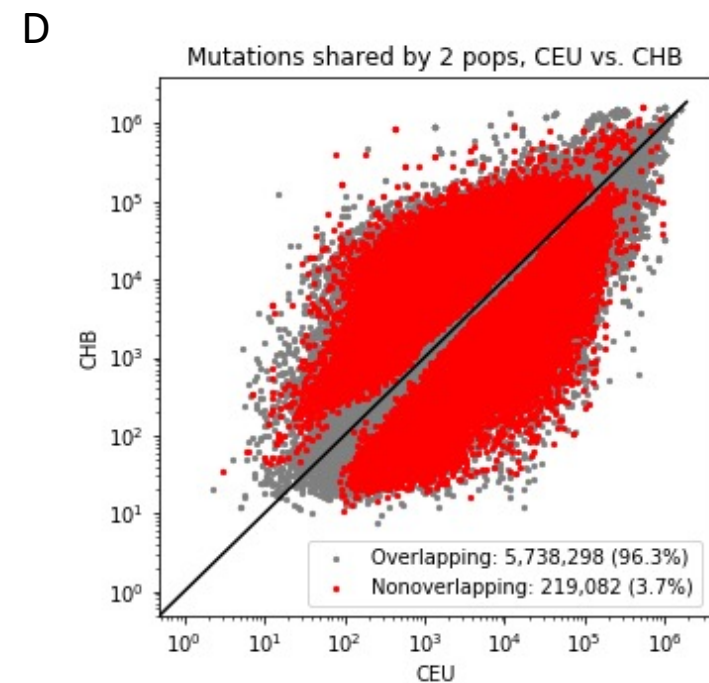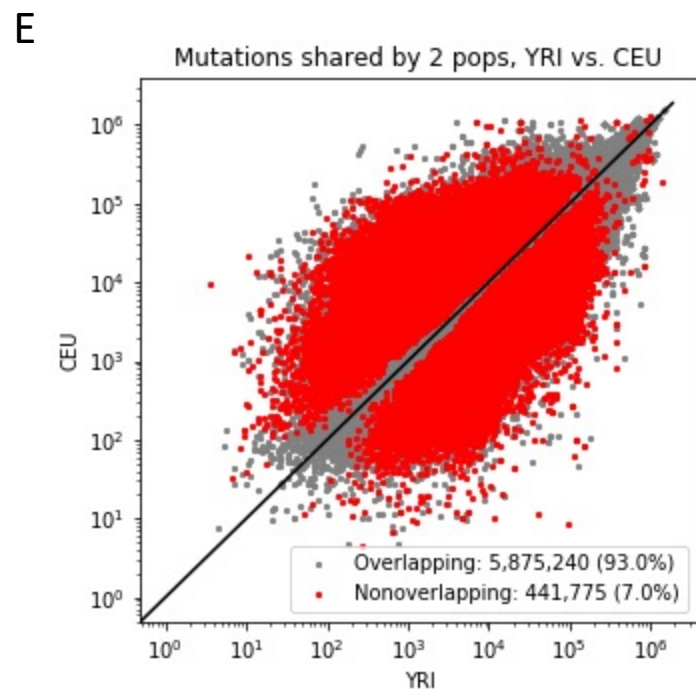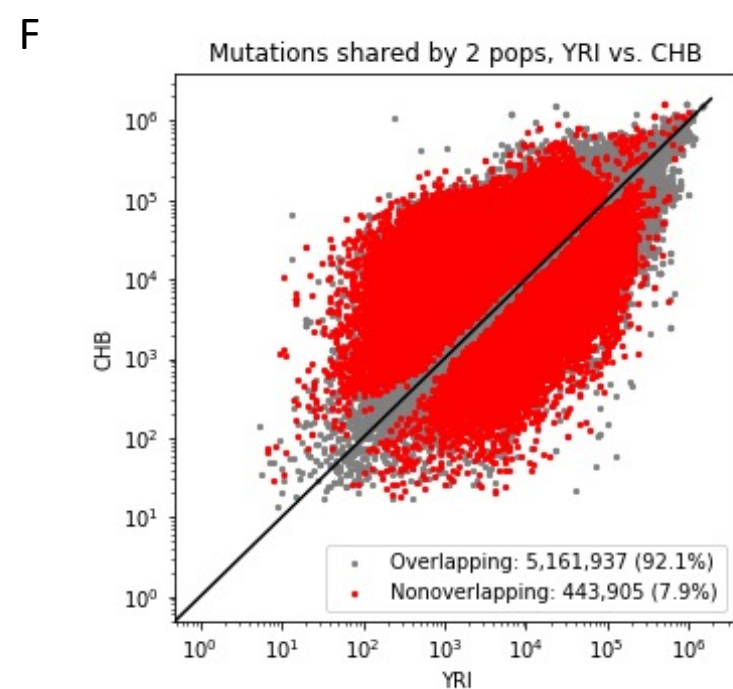

Supplement: supp [file elife-81188-supp-v1.zip › elife_poa_e81188_Figure_2_figure_supplement_7.pdf]

Allele age (generations)

T>C/T>G

T>C/T>A

T>A/T>G

(66500,3e+06]  
(42100,66500]  
(28600,42100]  
(19900,28600]  
(13700,19900]  
(9040,13700]  
(5520,9040]  
(3130,5520]  
(1720,3130]  
(860,1720]  
(425,860]  
(233,425]  
(124,233]  
(55,124]  
(0,55]

3.9

4.2

4.5

4.8

5.1

4.0

4.5

5.0

5.5

0.90

0.95

1.00

1.05

1.10

1.15

Mutation Ratios

Population

CEU  
CHB  
YRI

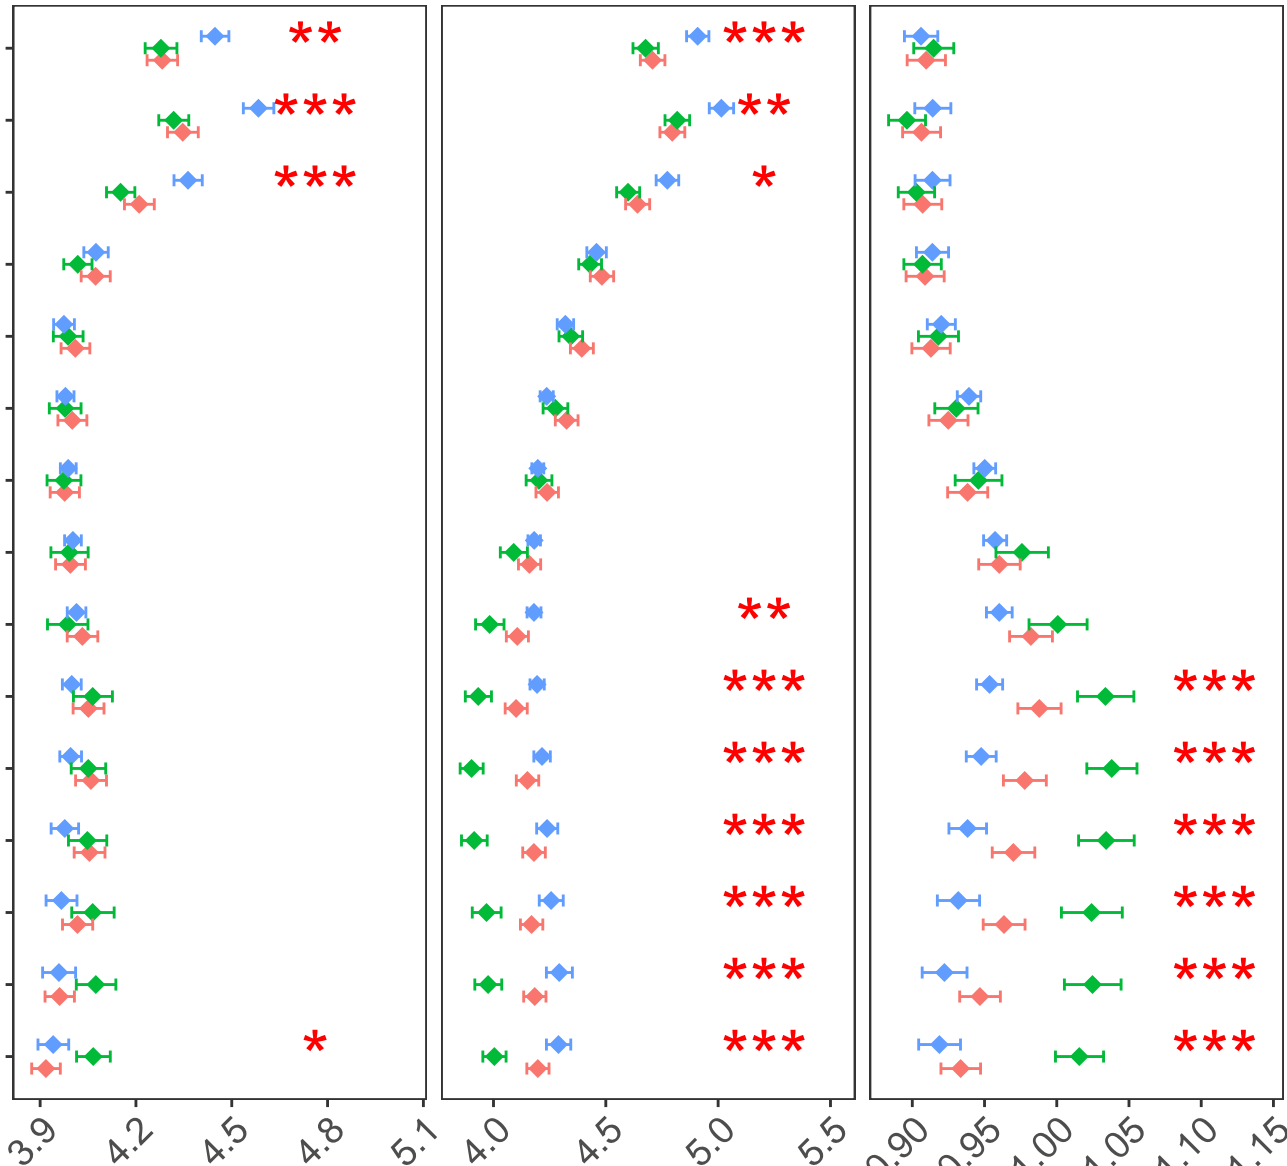

Supplement: supp [file elife-81188-supp-v1.zip › elife_poa_e81188_Figure_2_figure_supplement_9.pdf]

A

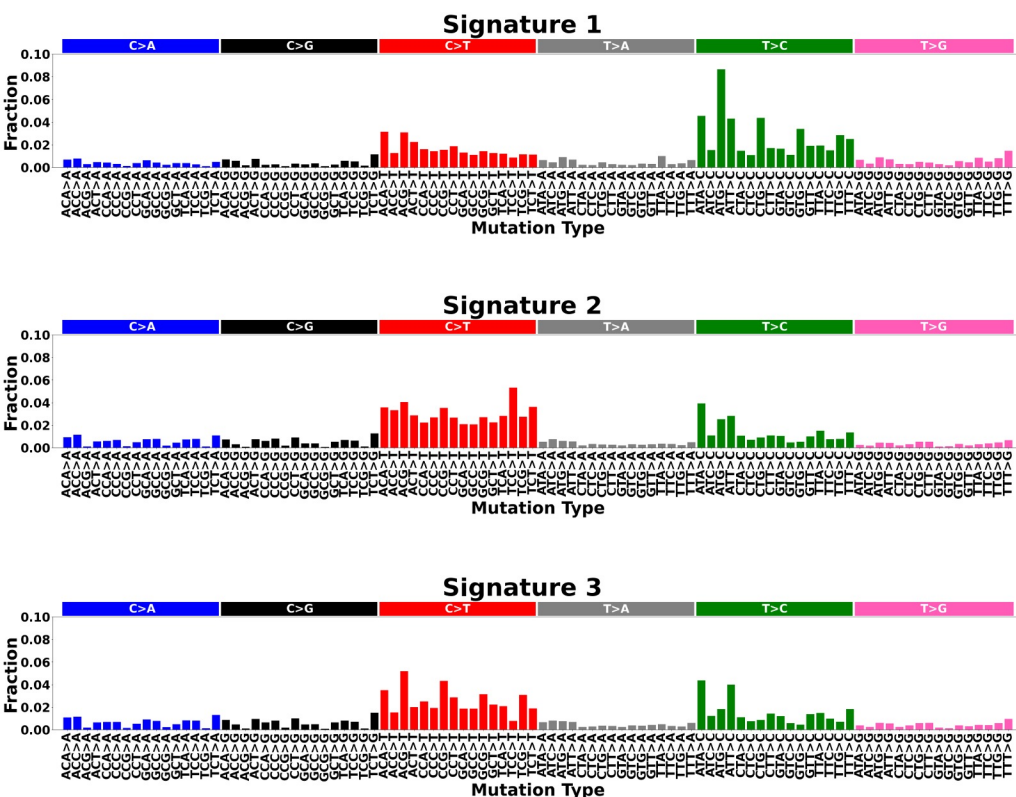

B

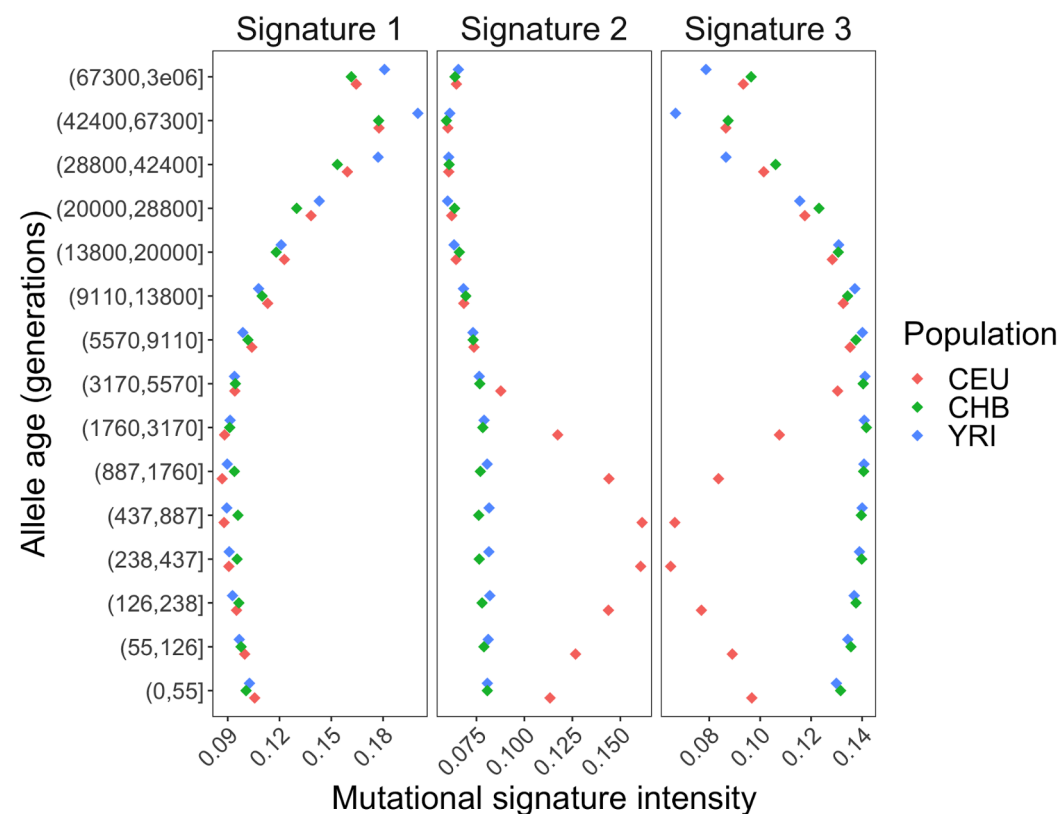

C

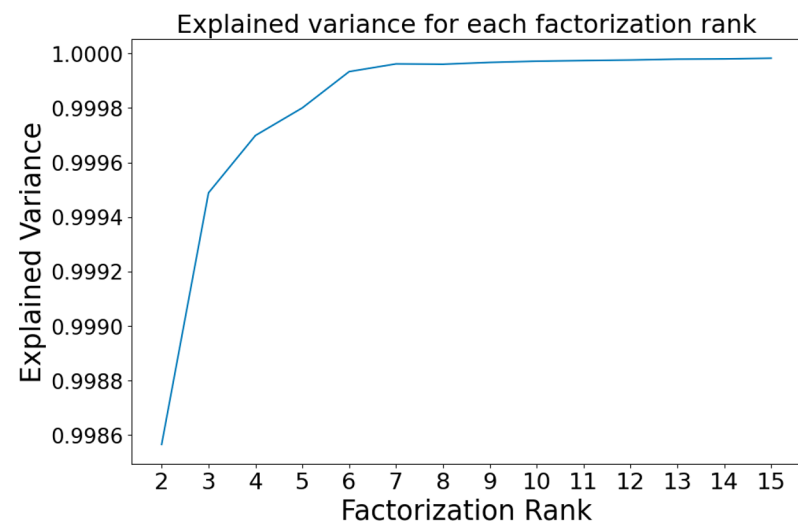

D

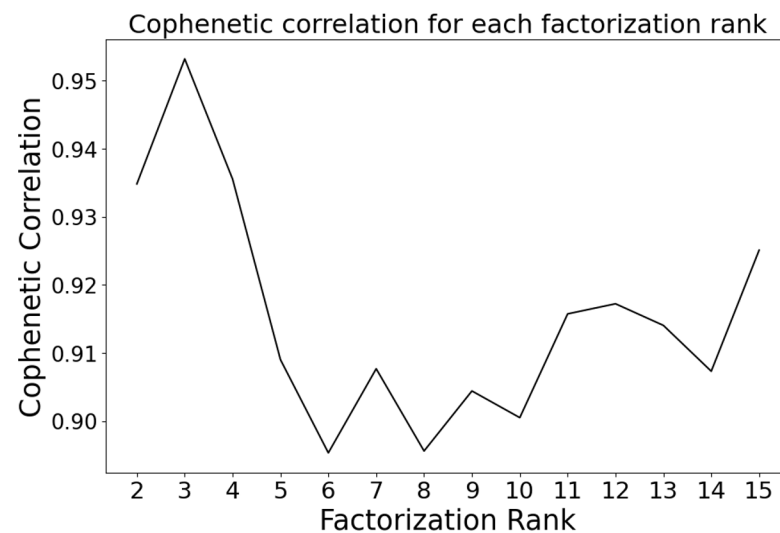

Supplement: supp [file elife-81188-supp-v1.zip › elife_poa_e81188_Figure_2_figure_supplement_10.pdf]

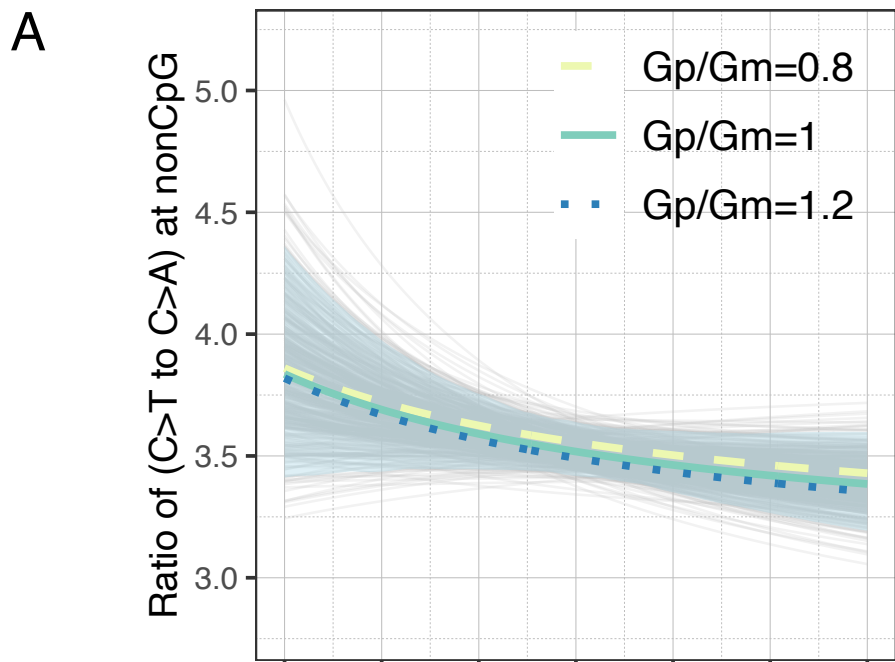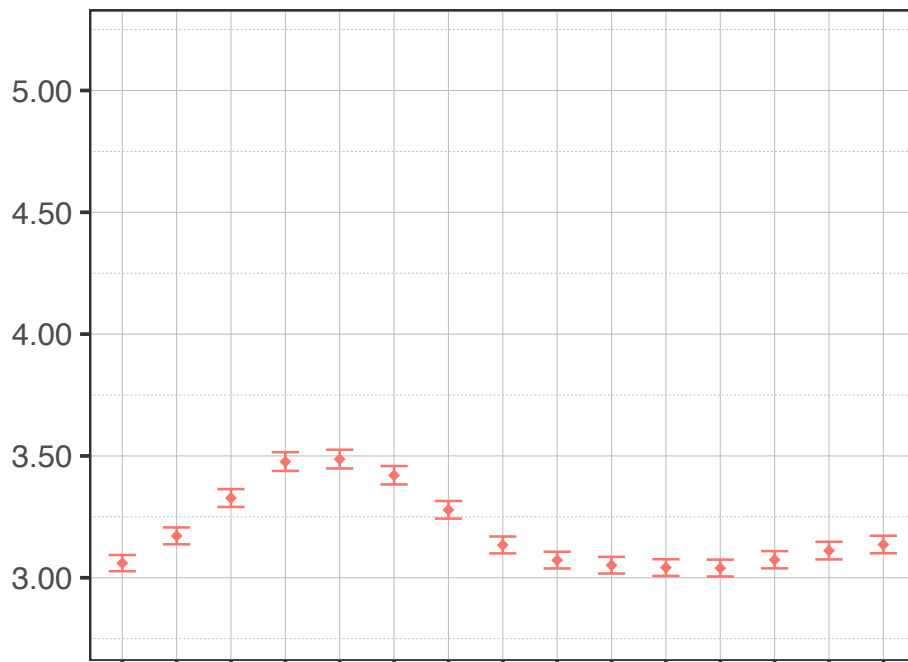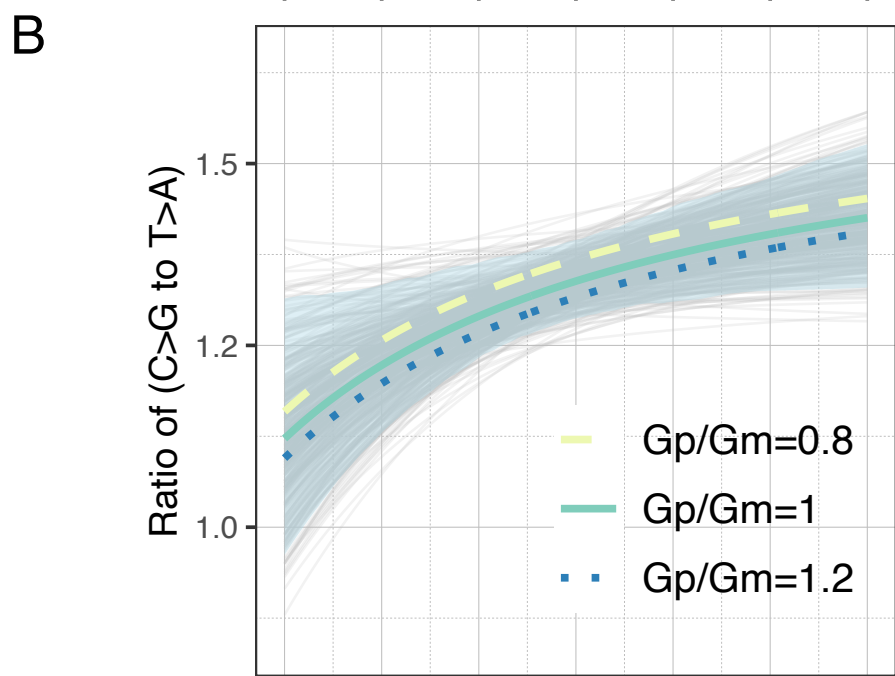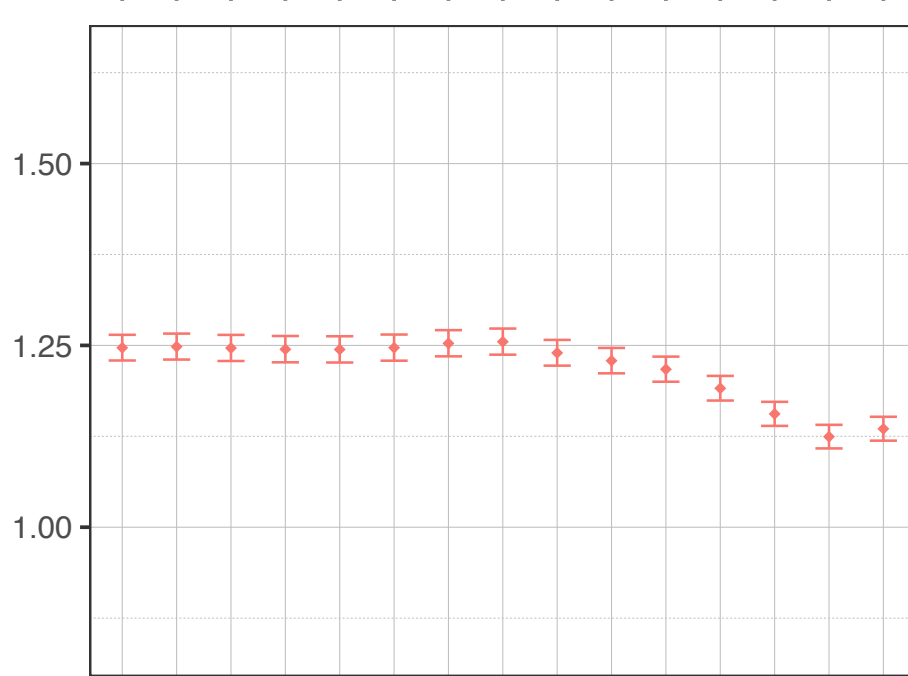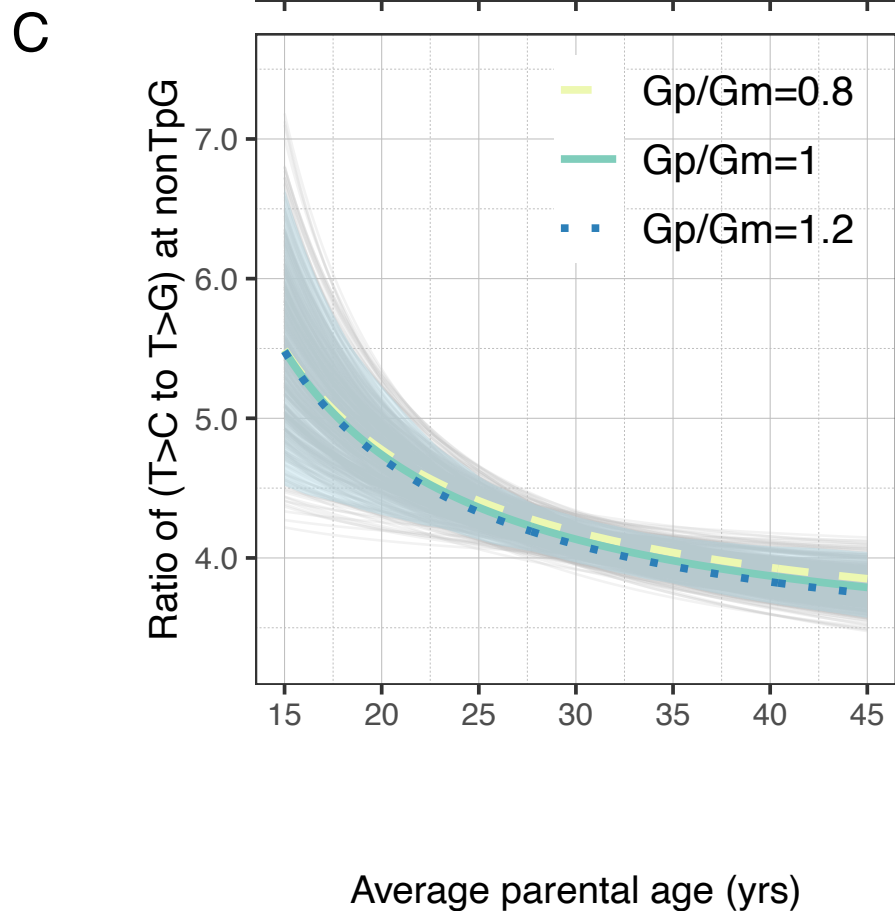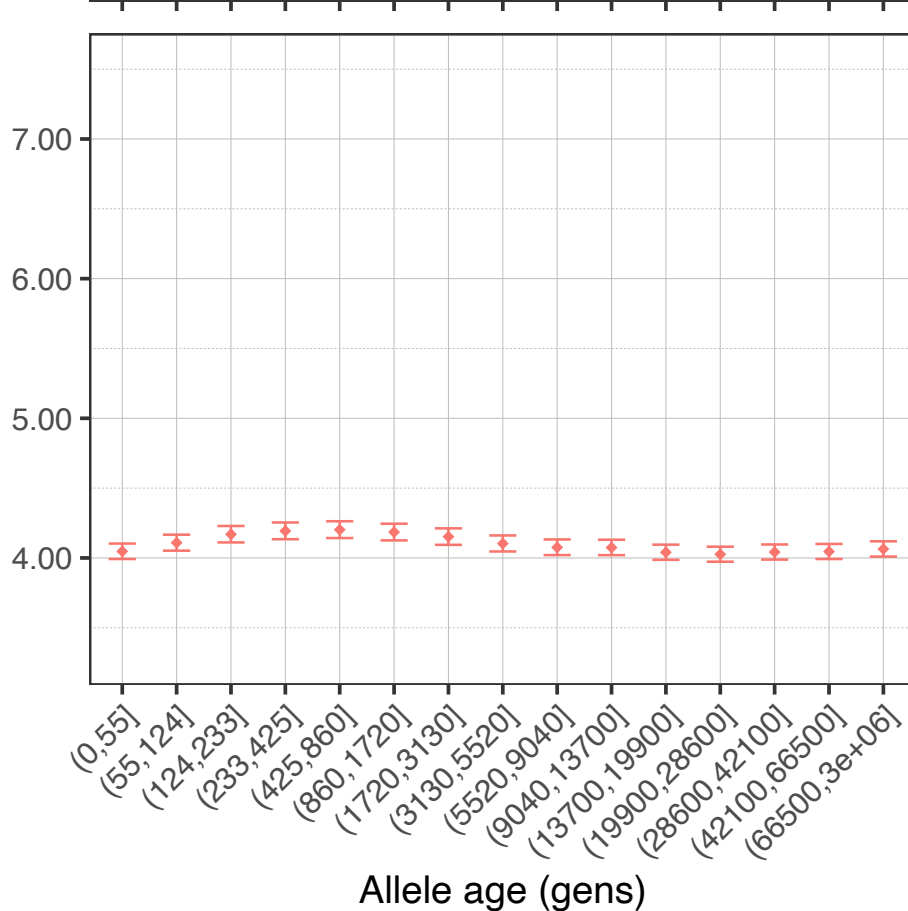

Supplement: supp [file elife-81188-supp-v1.zip › elife_poa_e81188_Figure_3_figure_supplement_1.pdf]

Predicted DNM ratio  
by parental ages

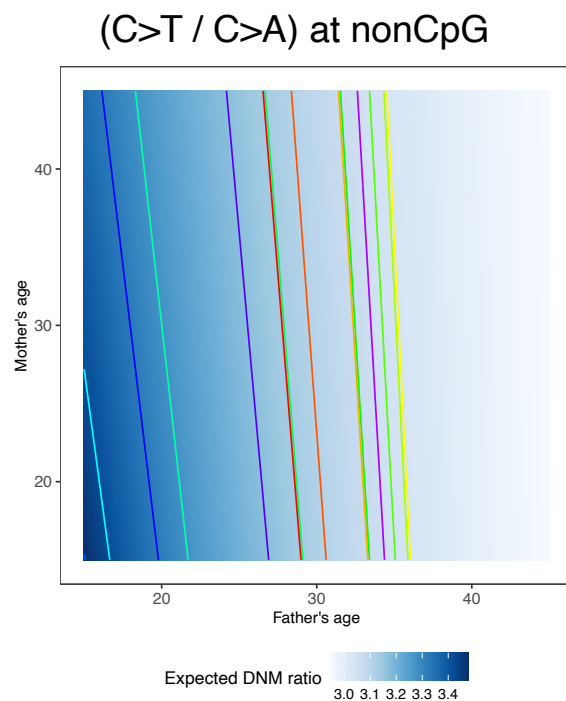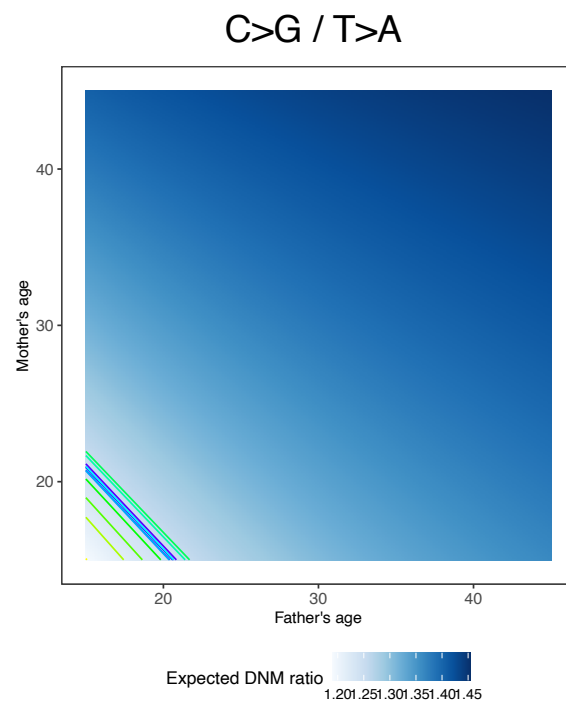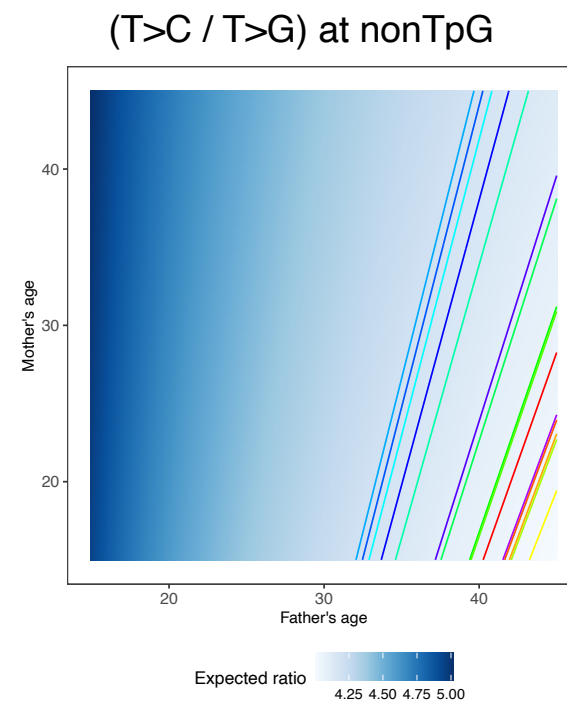

Polymorphism ratio  
by allele age

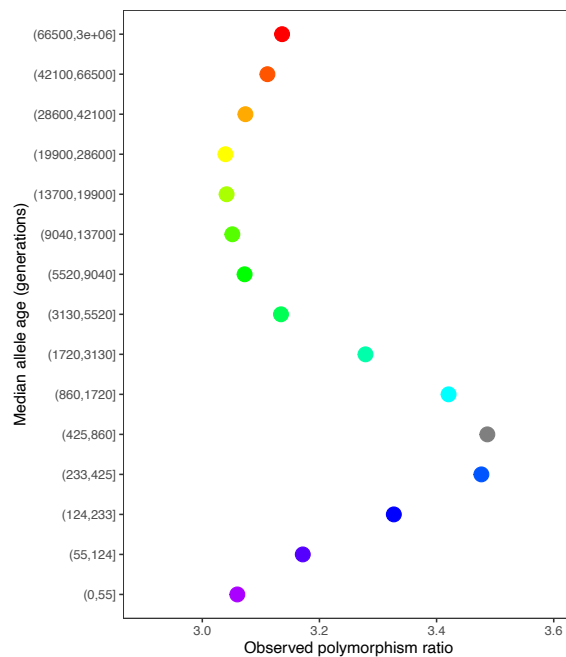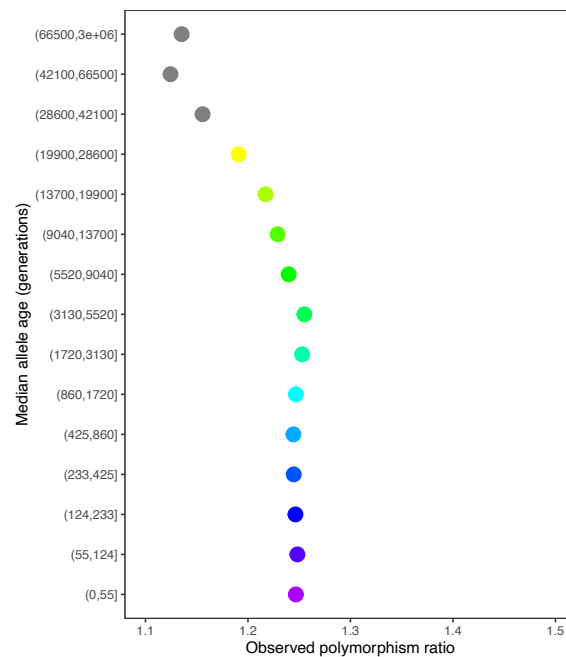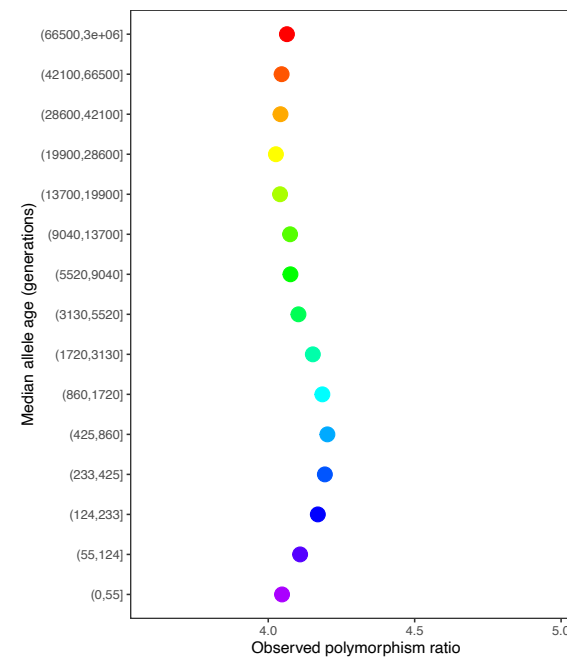

Supplement: supp [file elife-81188-supp-v1.zip › elife_poa_e81188_Figure_3_figure_supplement_3.pdf]

A. Gp/Gm=0.8

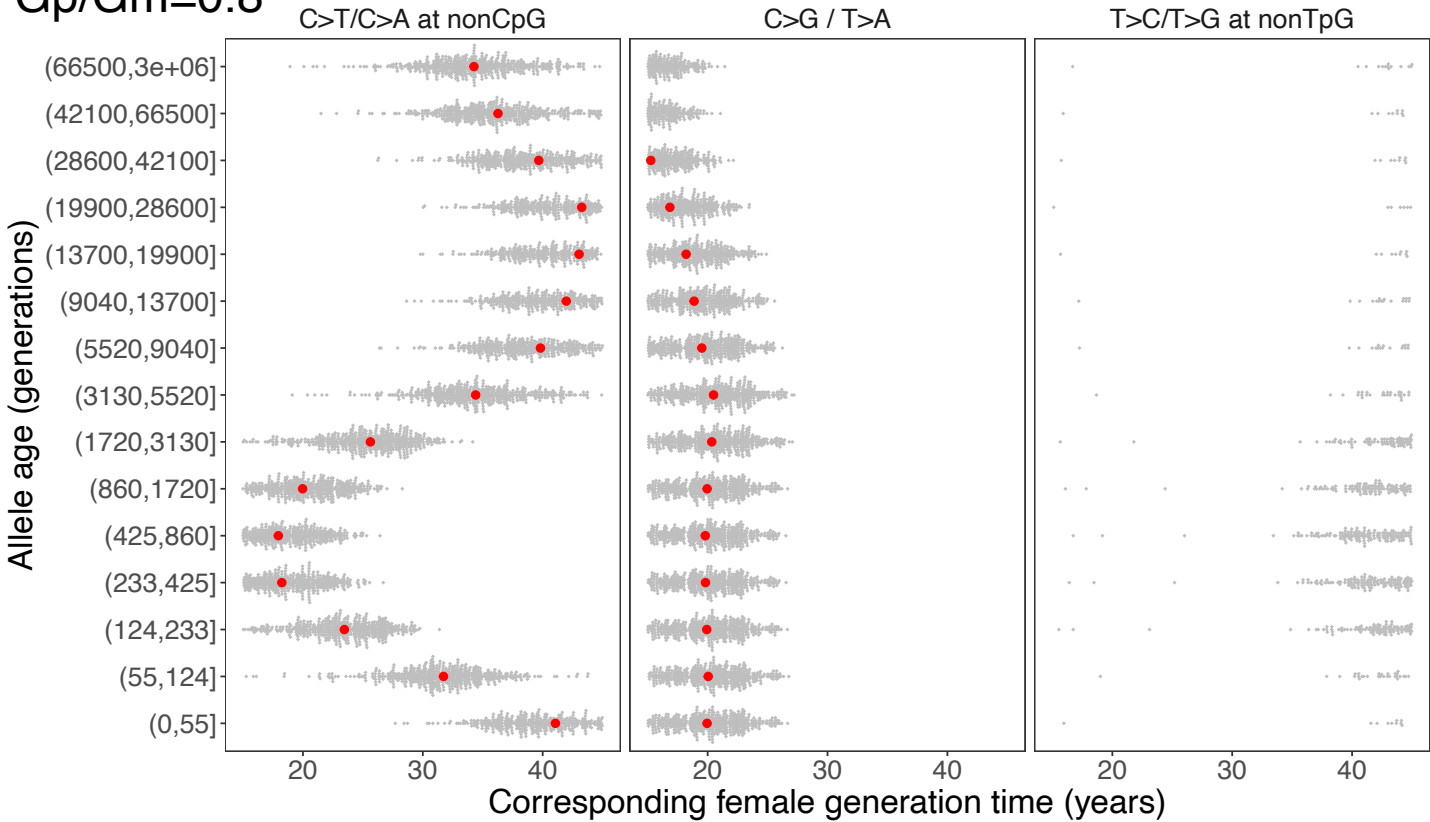

B. Gp/Gm=1.1

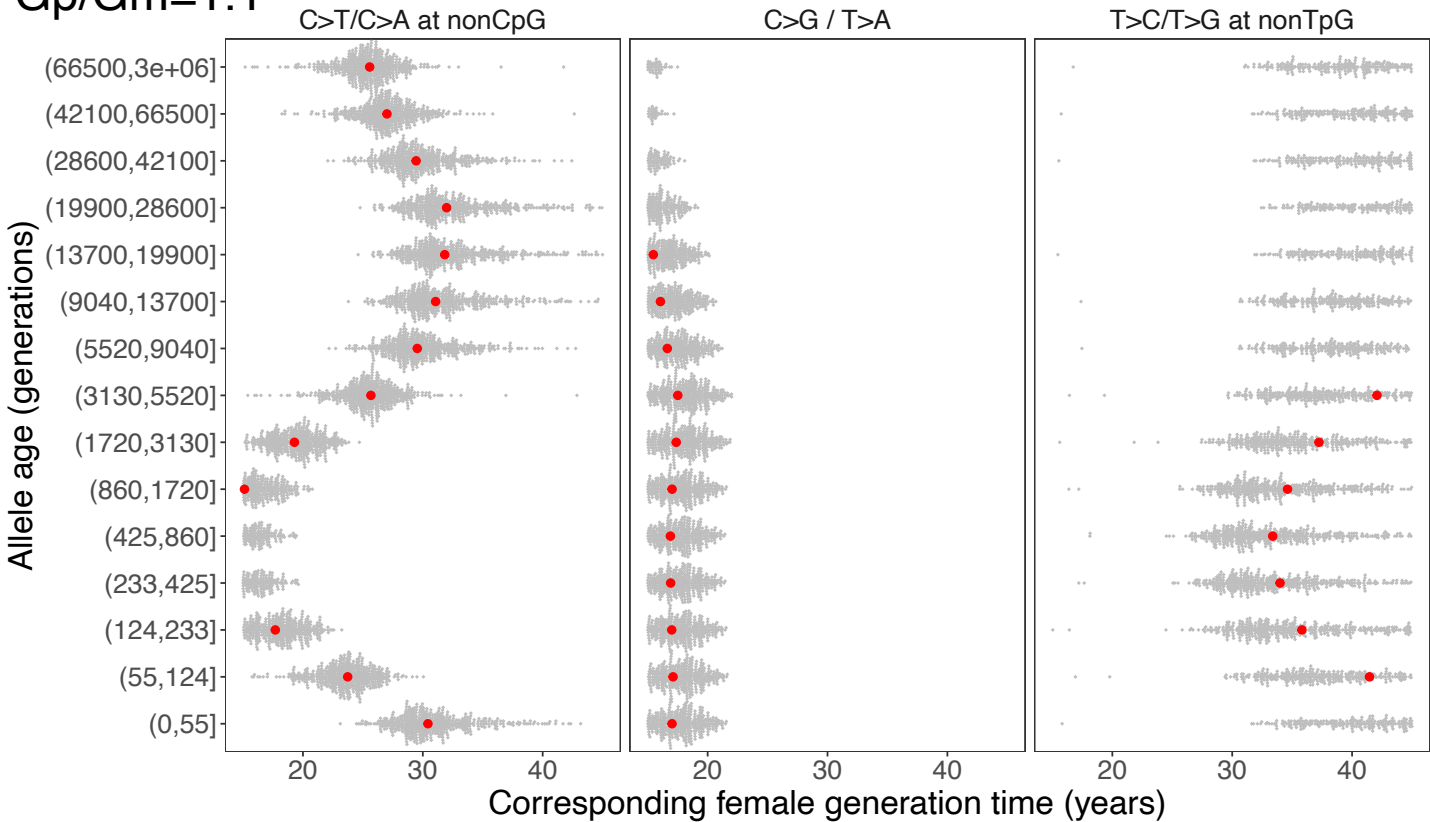

C. Gp/Gm=1.2

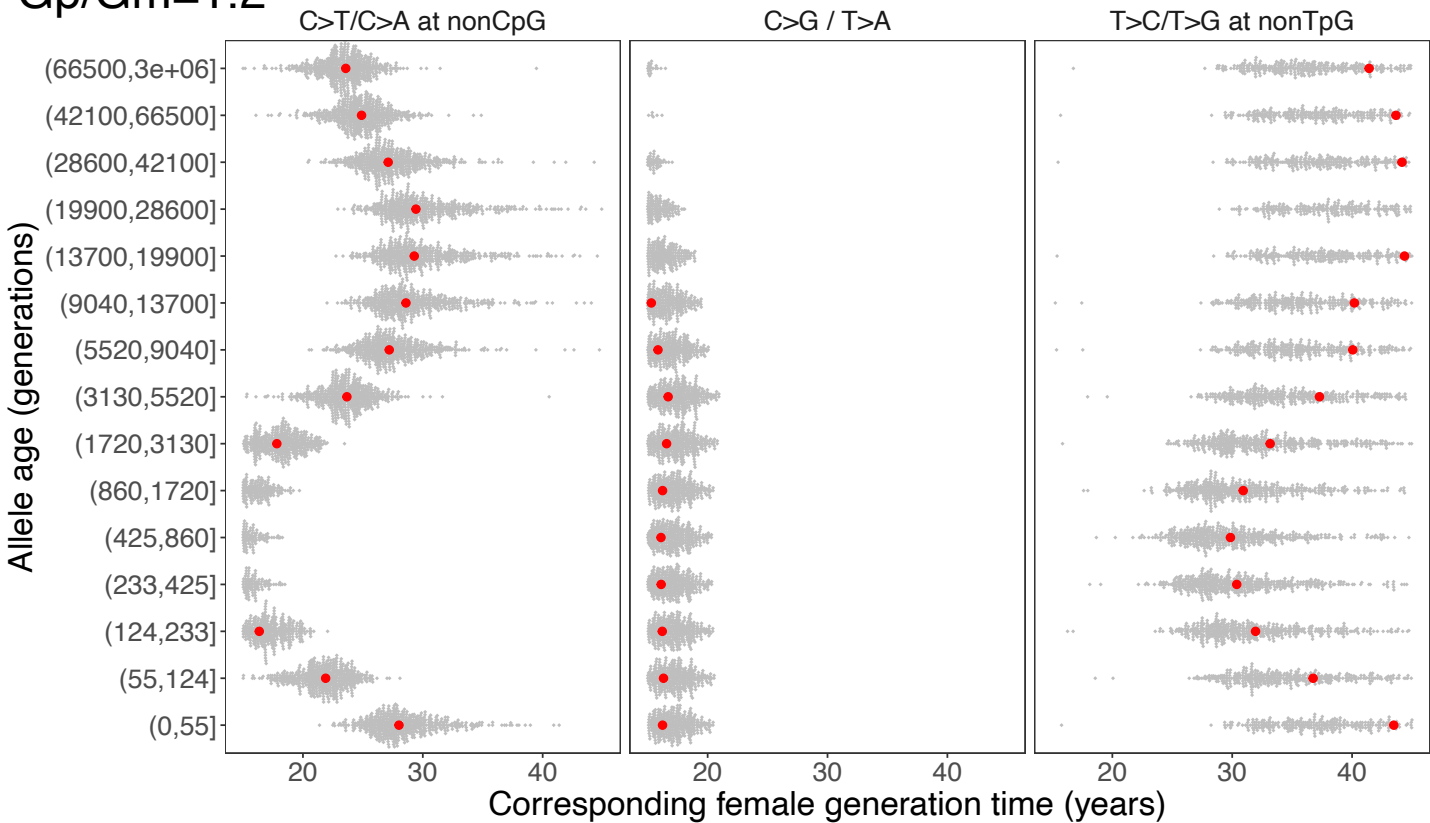

Supplement: supp [file elife-81188-supp-v1.zip › elife_poa_e81188_Figure_4_figure_supplement_1.pdf]

A. Gp/Gm=0.8

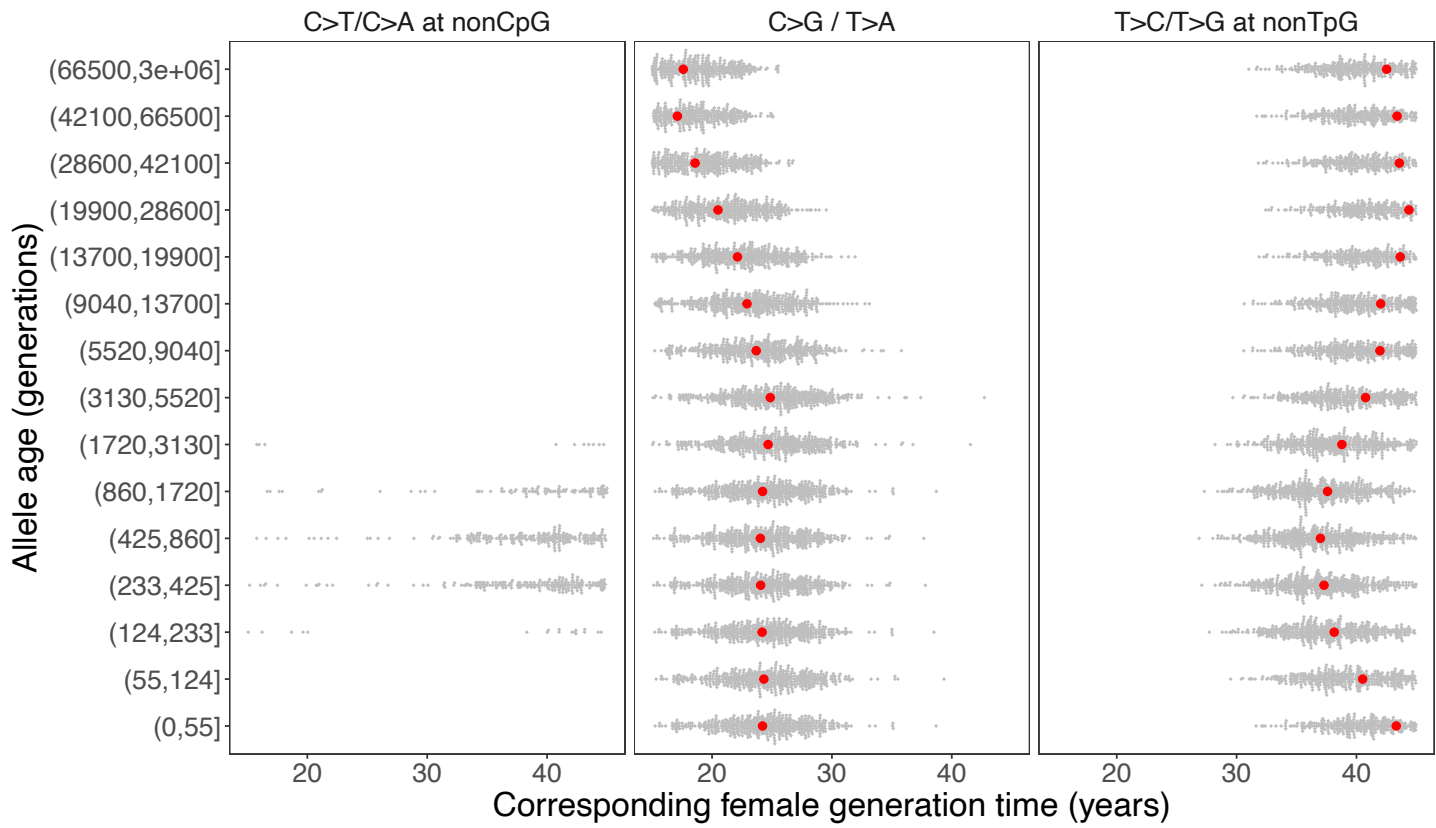

B. Gp/Gm=1.0

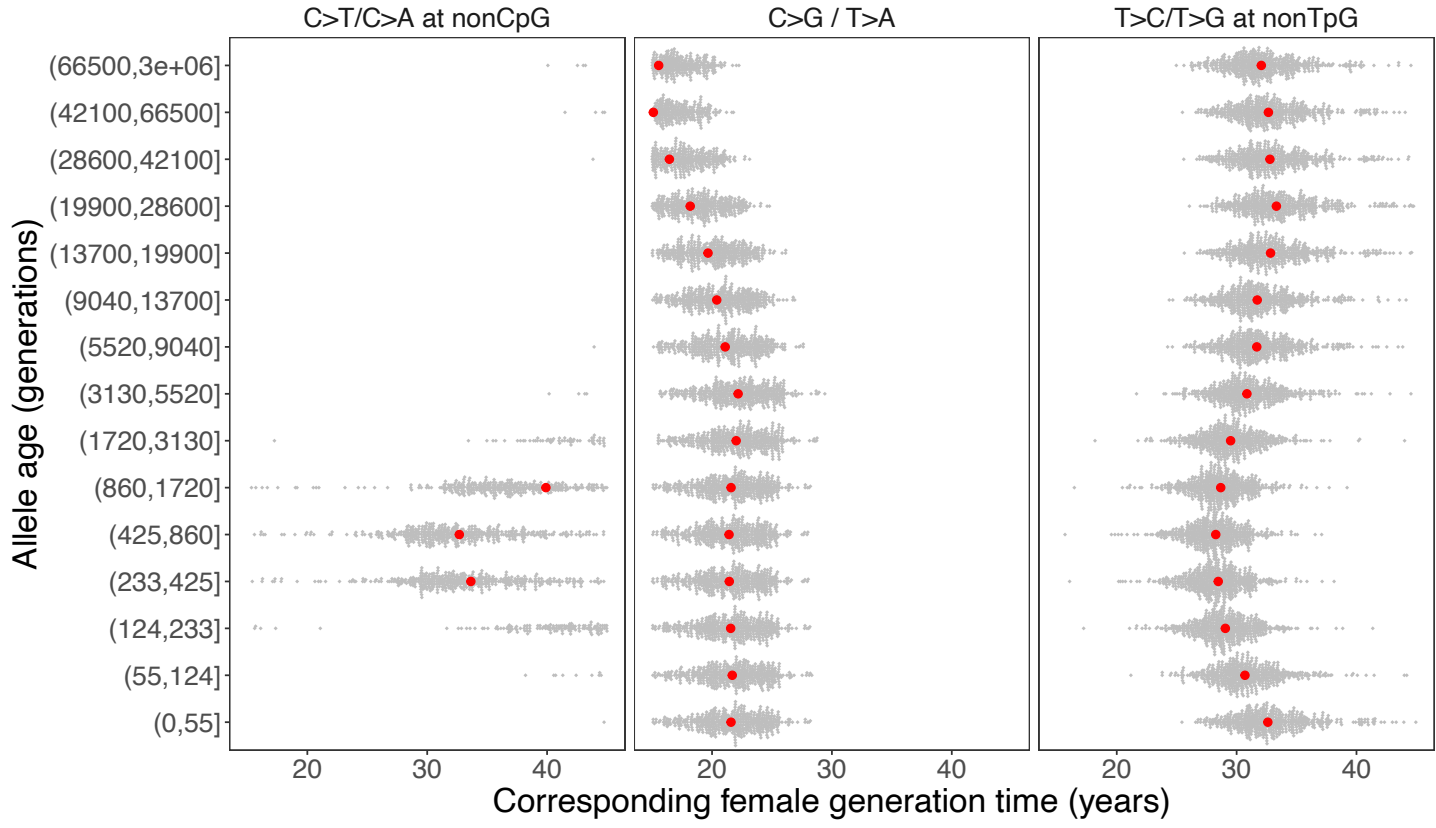

C. Gp/Gm=1.2

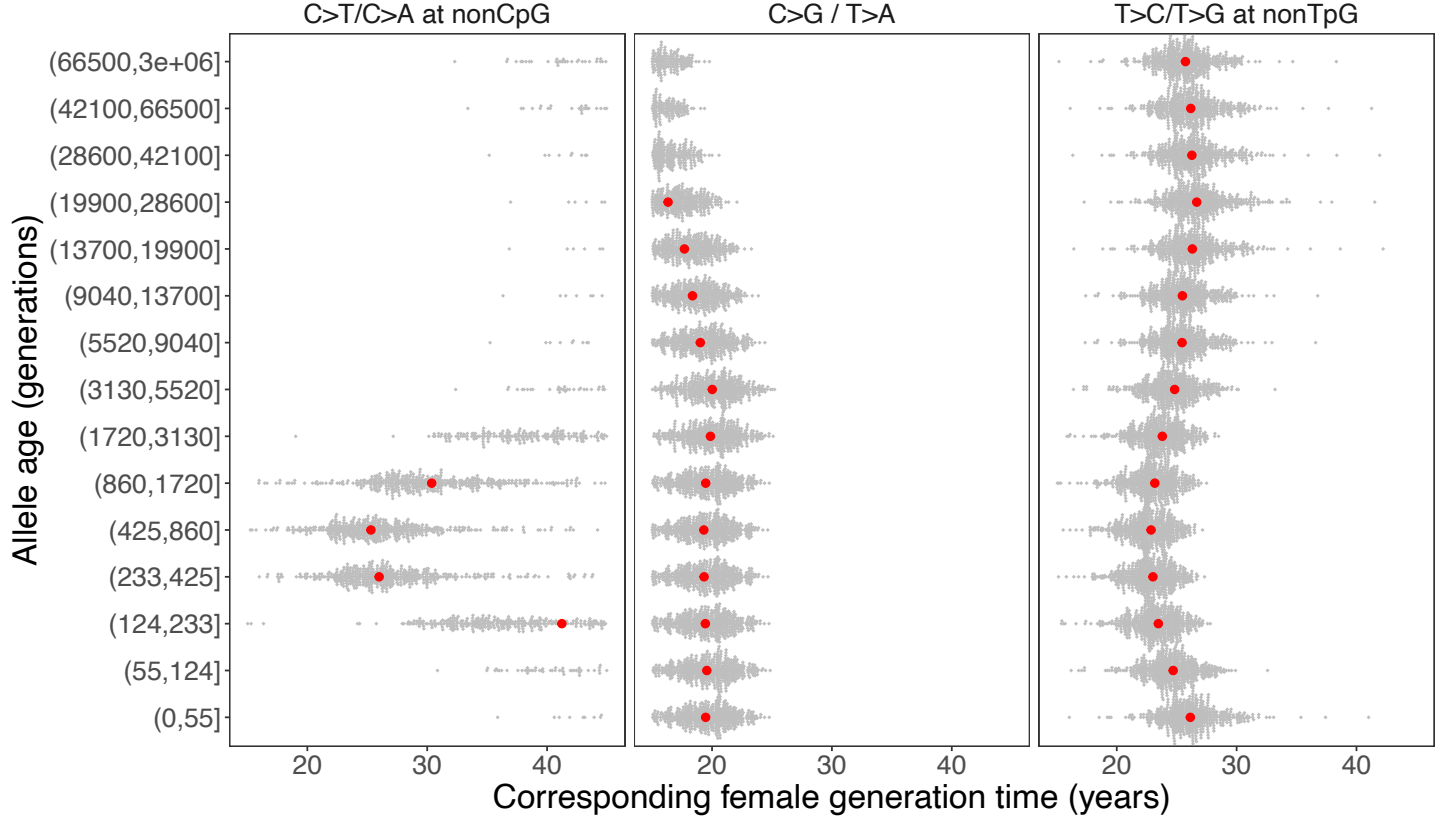

Supplement: supp [file elife-81188-supp-v1.zip › elife_poa_e81188_Figure_4_figure_supplement_2.pdf]
